# Supplementary material
Source: PubMed Central journal article supplement (PMC2915462)

# **Molecular rotors: Synthesis and evaluation as viscosity sensors**

*Jeyanthi Sutharsan, Darcy Lichlyter, Nathan E. Wright, Marianna Dakanali, Mark A. Haidekker\* and Emmanuel A. Theodorakis\**

## **Supporting Information**

<sup>1</sup>H and <sup>13</sup>C NMR spectra of compounds reported in this manuscript

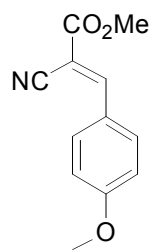

3.92  
3.90

7.01  
6.99

8.19  
8.02  
8.00

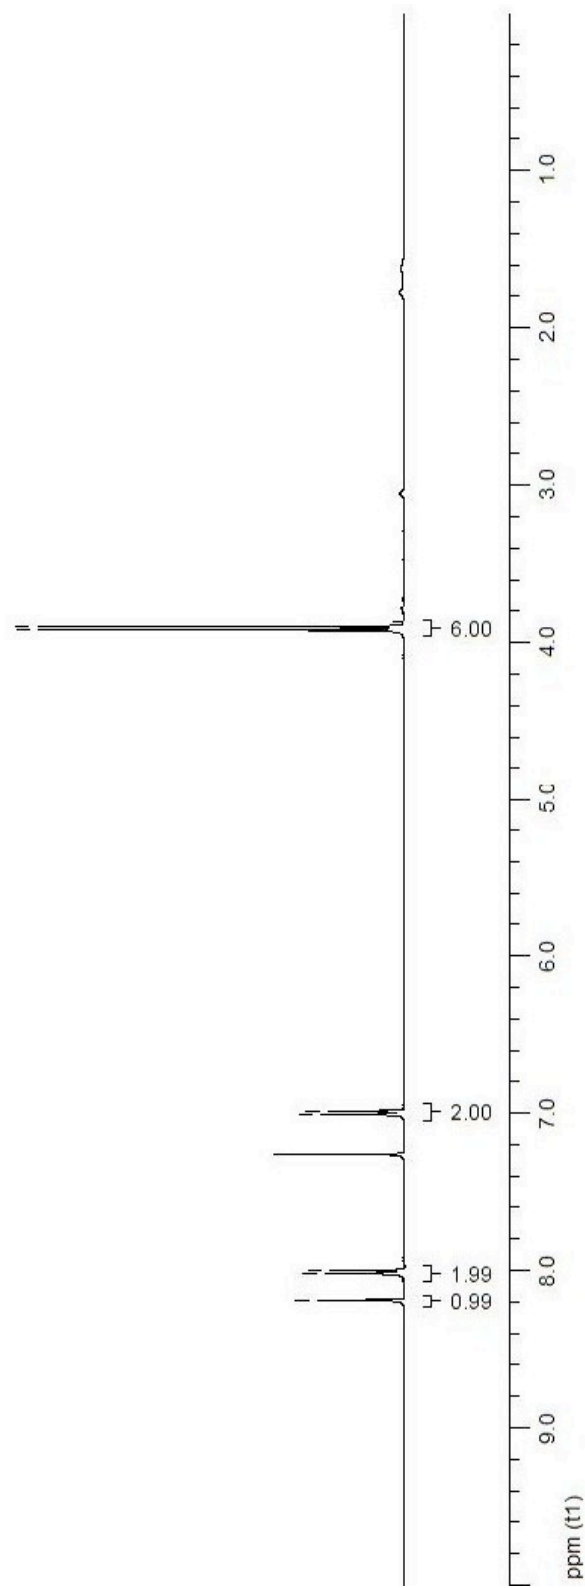

**Spectrum 1.** <sup>1</sup>H NMR (CDCl<sub>3</sub>, 400 MHz) of compound 5a

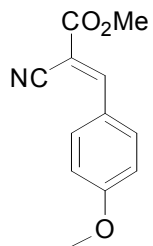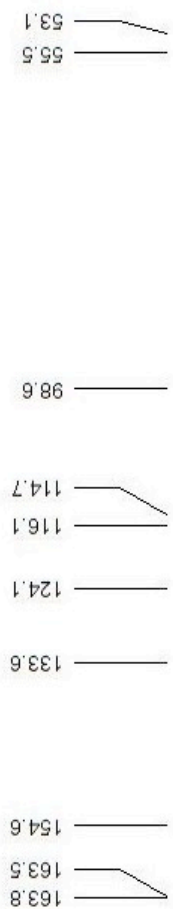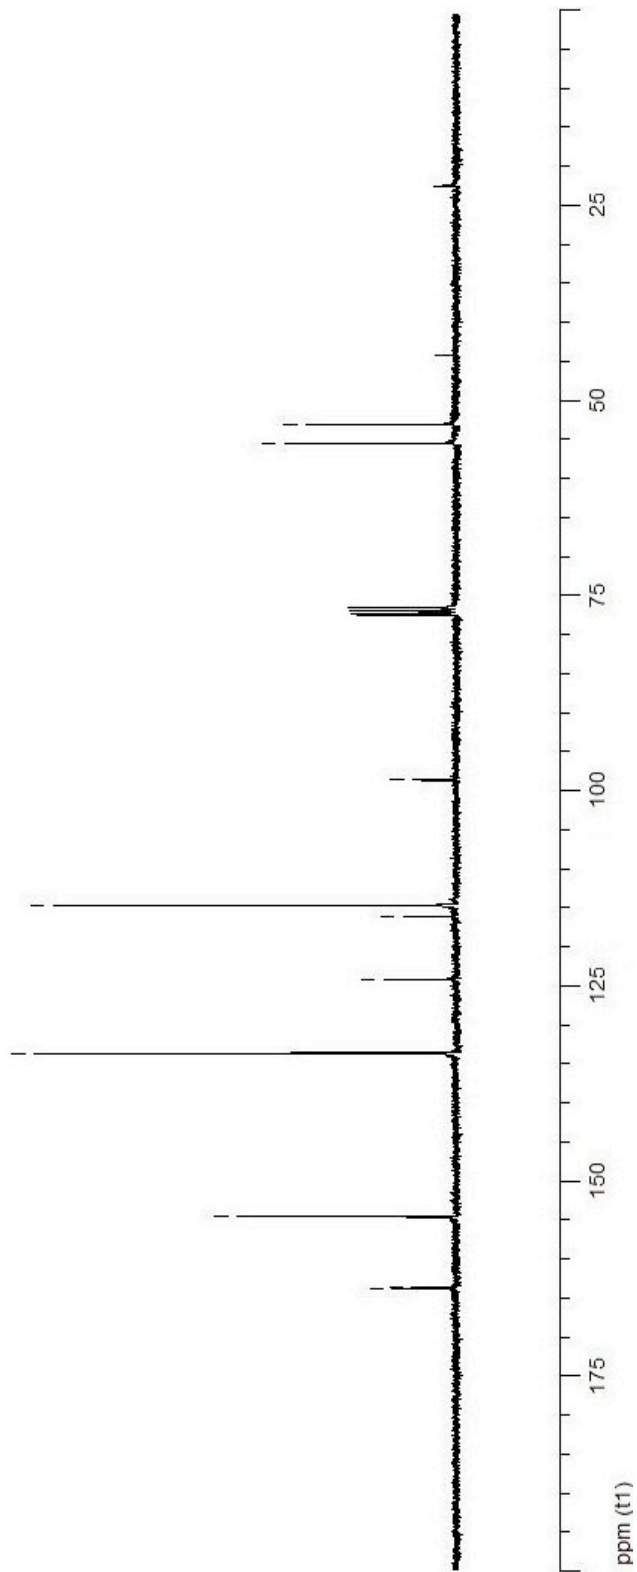

Spectrum 2. <sup>13</sup>CNMR (CDCl<sub>3</sub>, 100MHz) of compound 5a

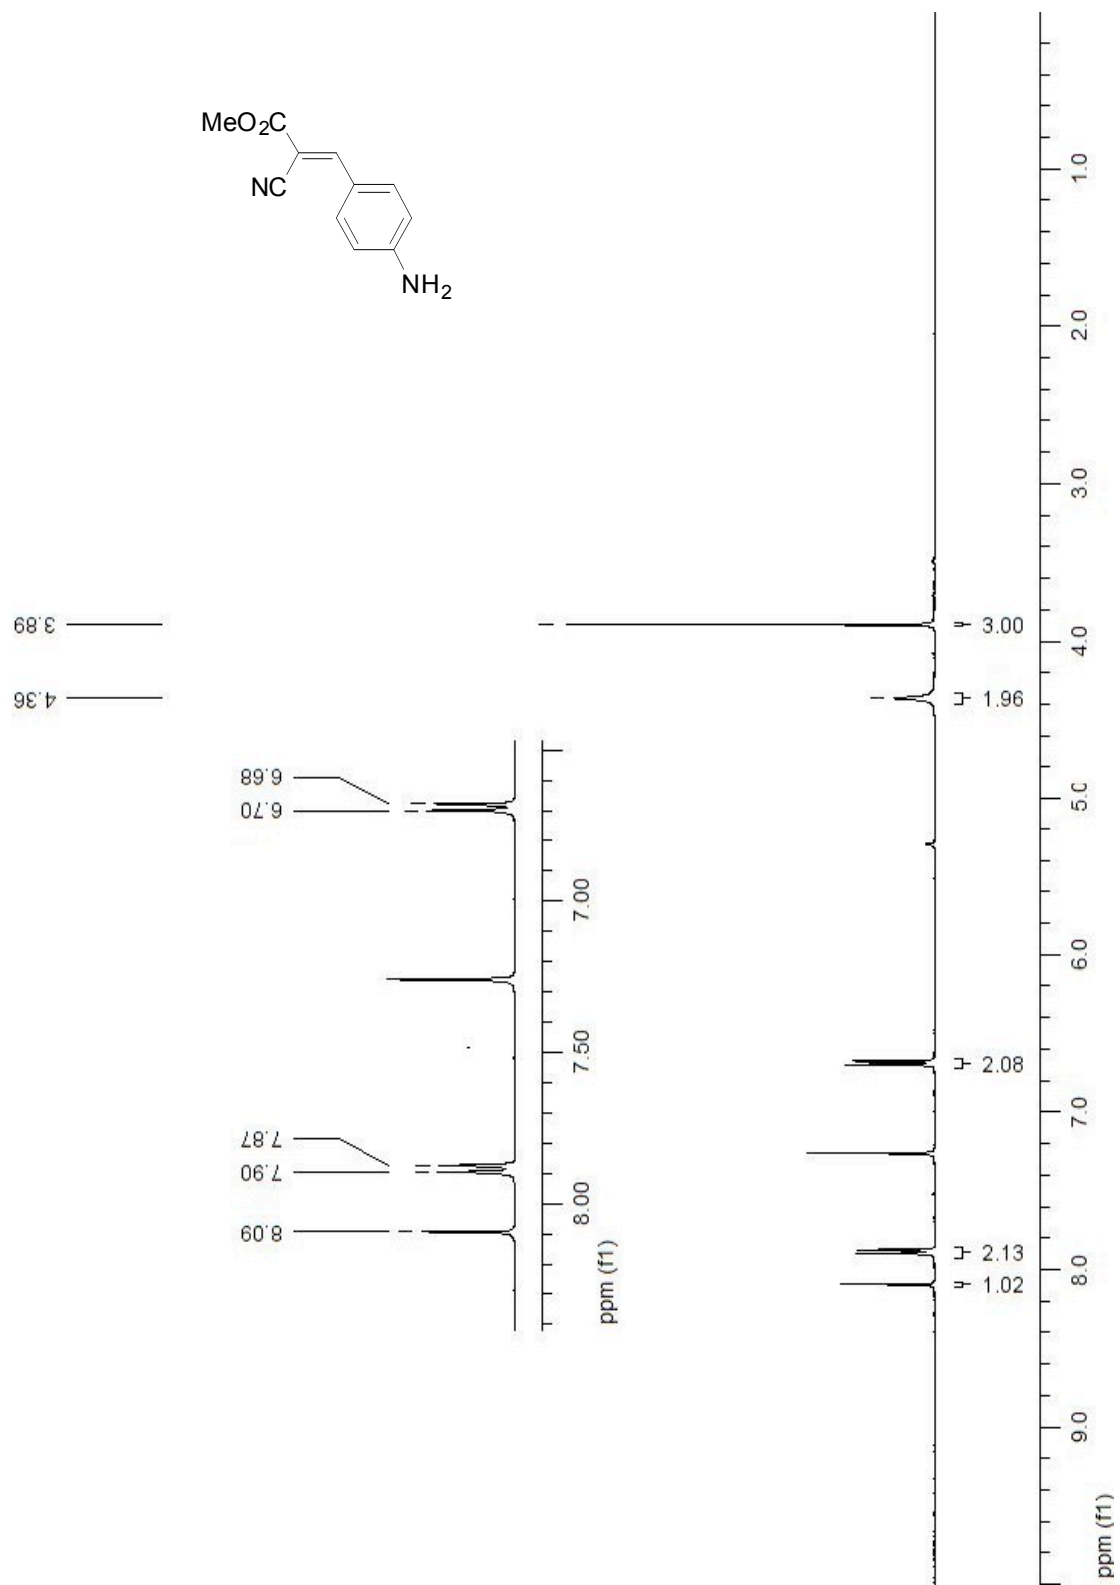

**Spectrum 3.** <sup>1</sup>H NMR (CDCl<sub>3</sub>, 400MHz) of compound **5b**

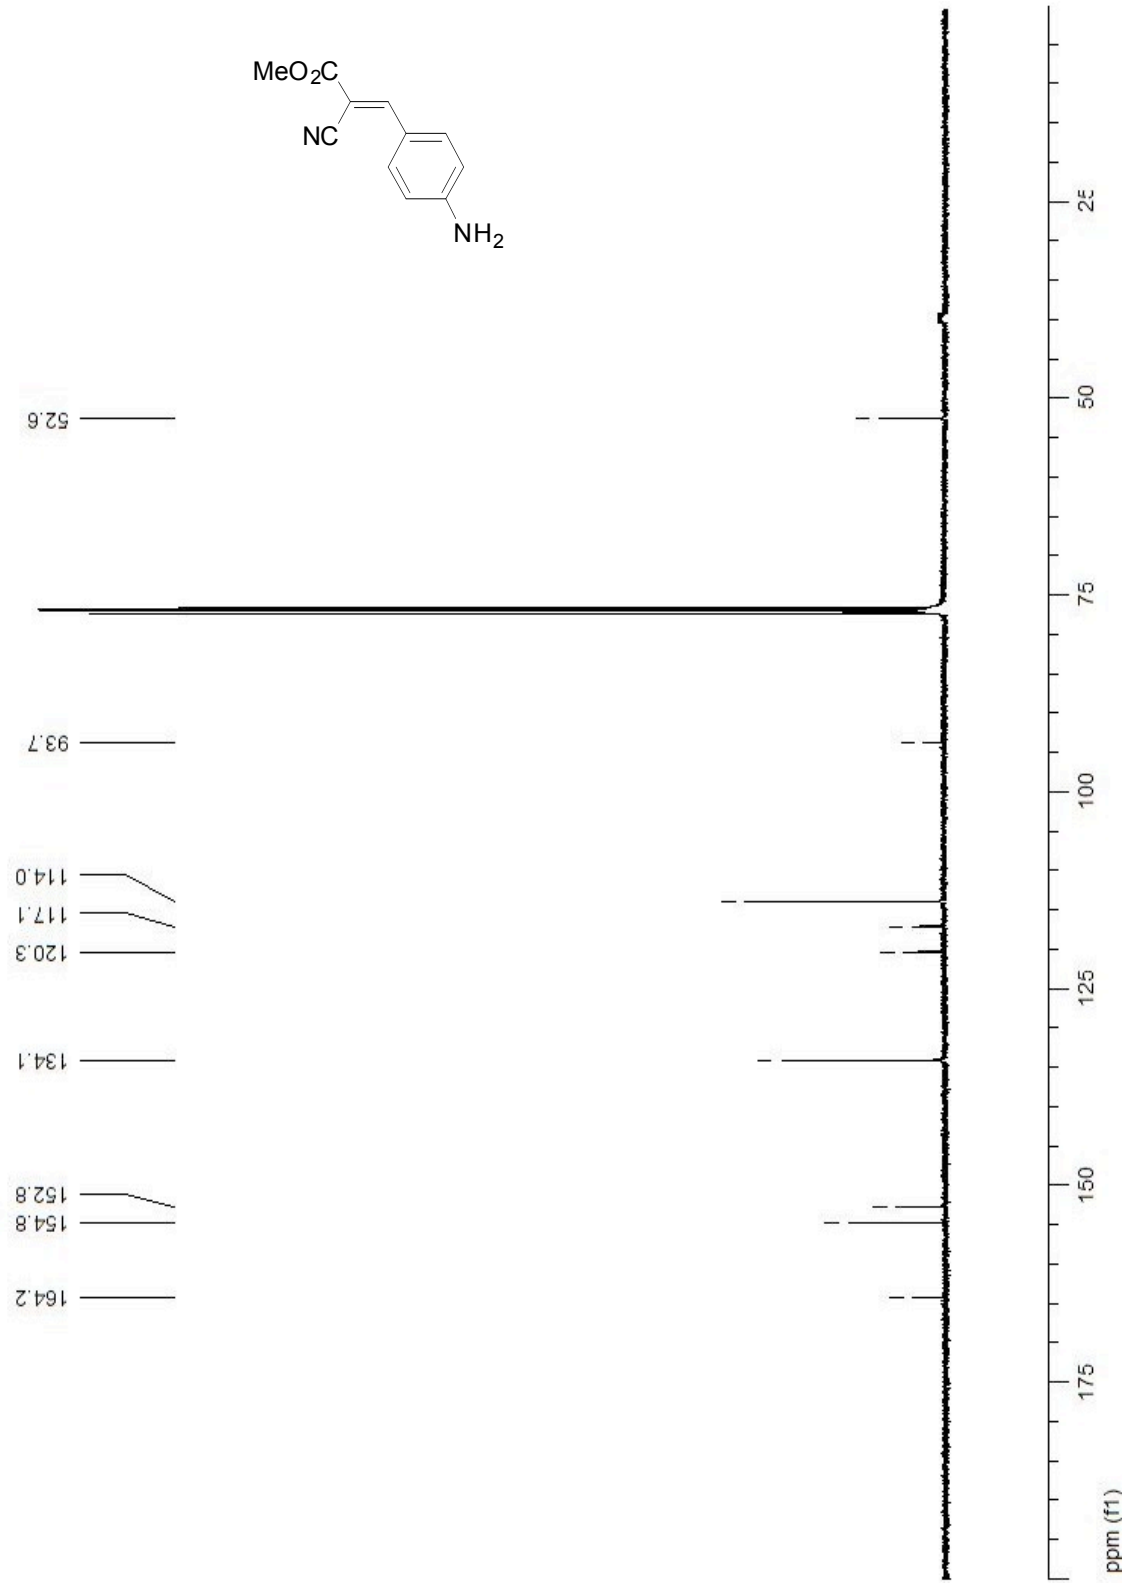

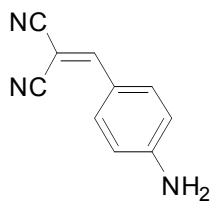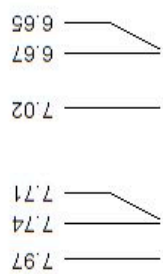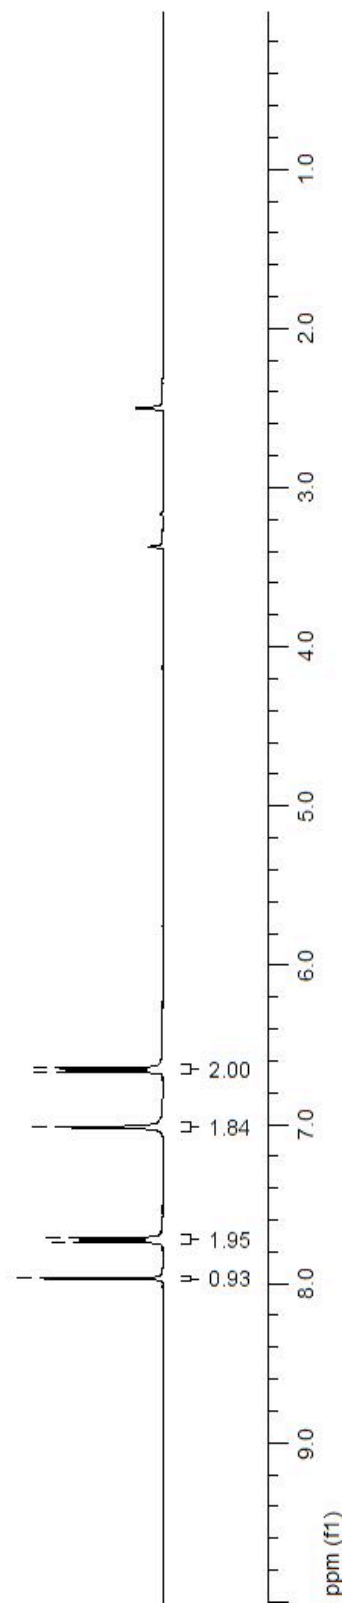

Spectrum 5. <sup>1</sup>H NMR (DMSO, 400MHz) of compound 5c

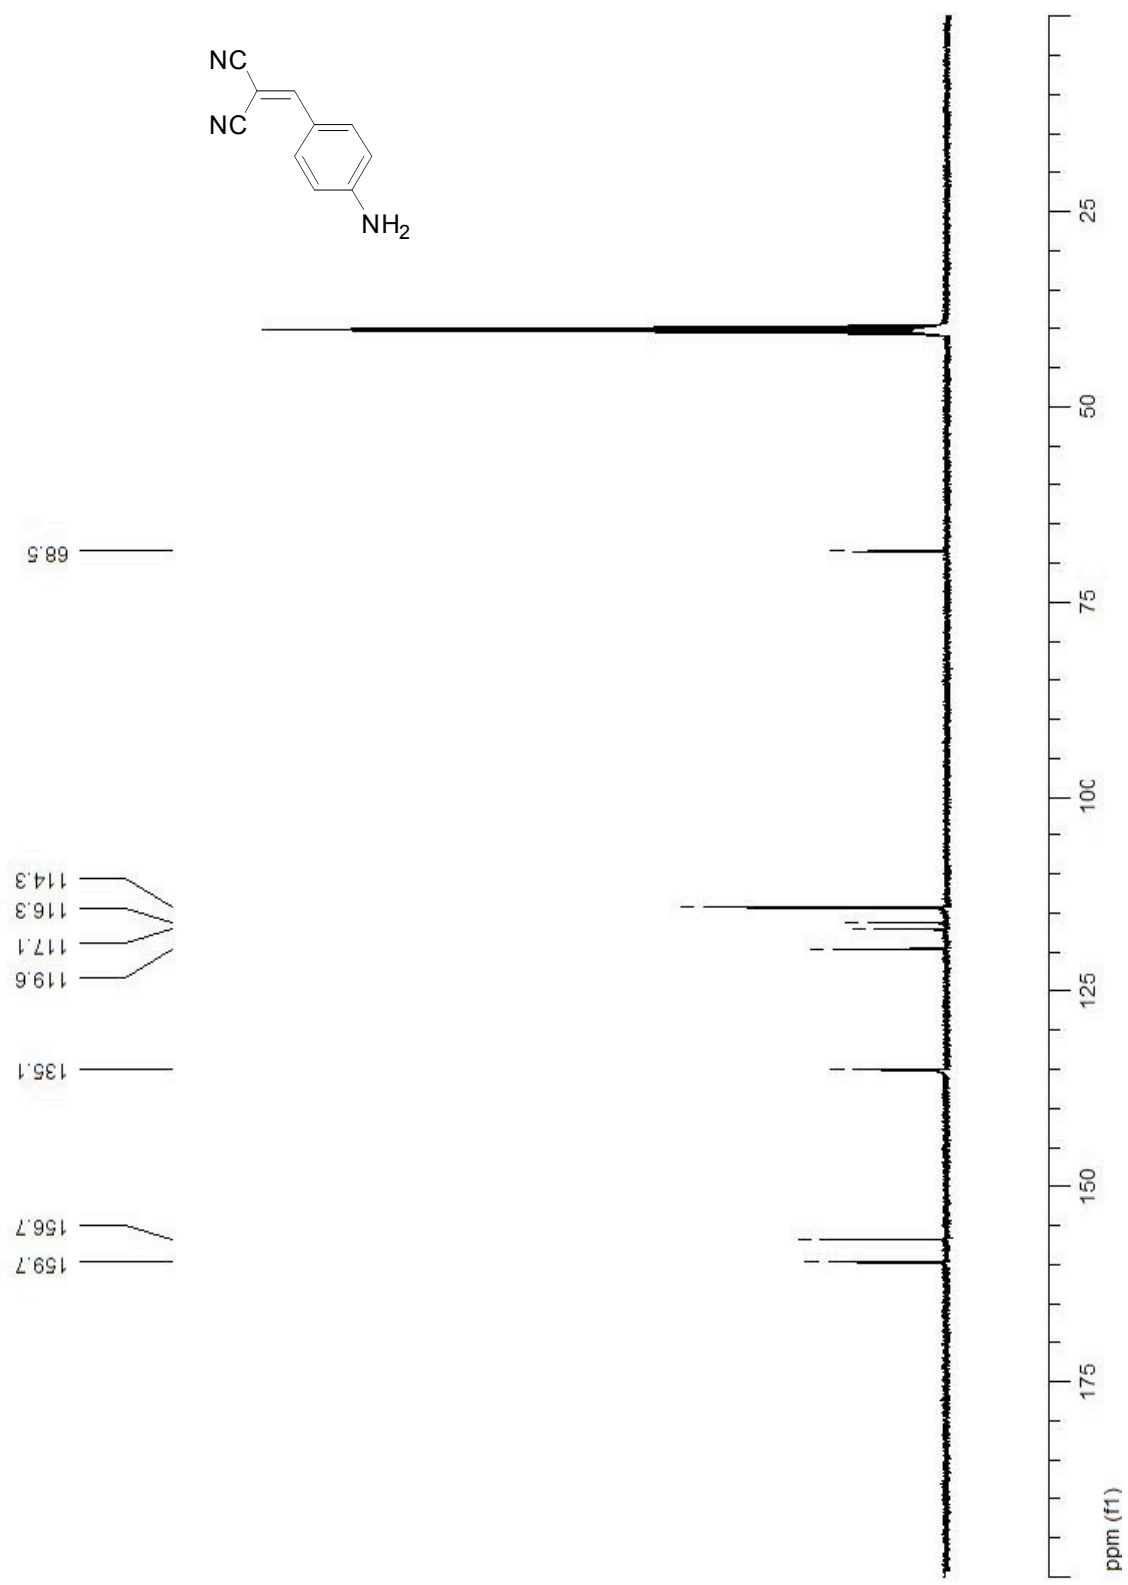

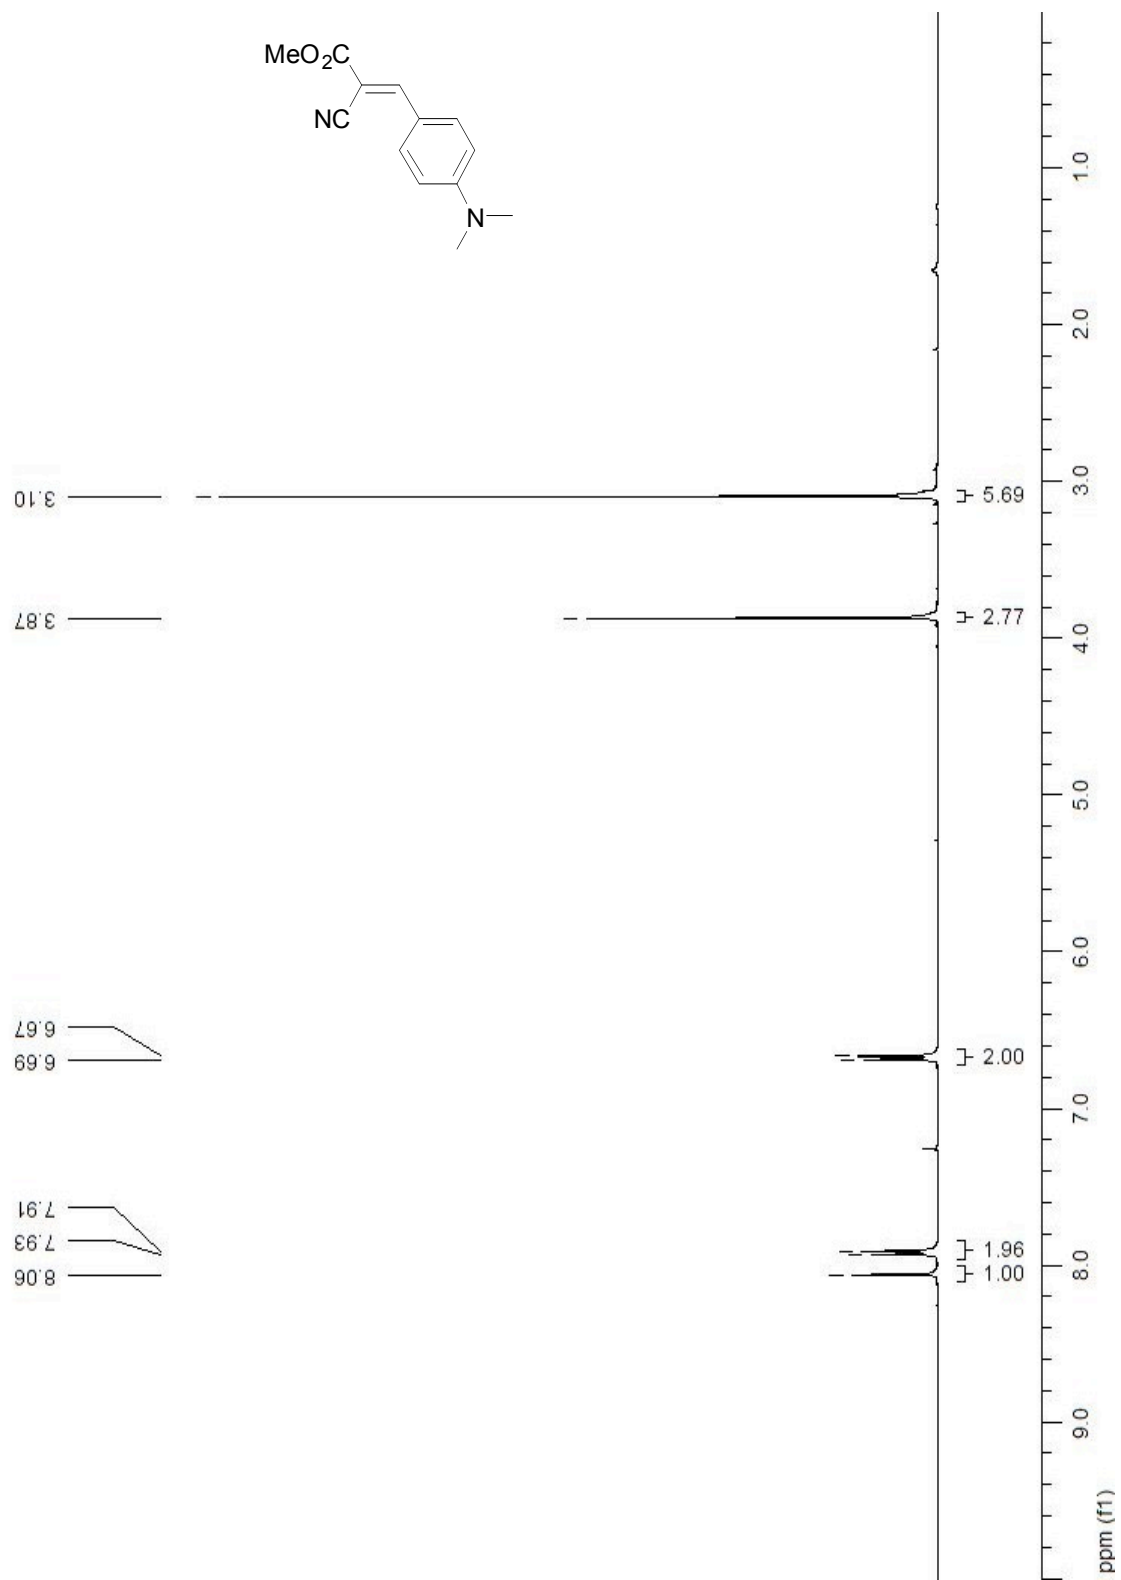

**Spectrum 7.** <sup>1</sup>H NMR (CDCl<sub>3</sub>, 400MHz) of compound **5d**



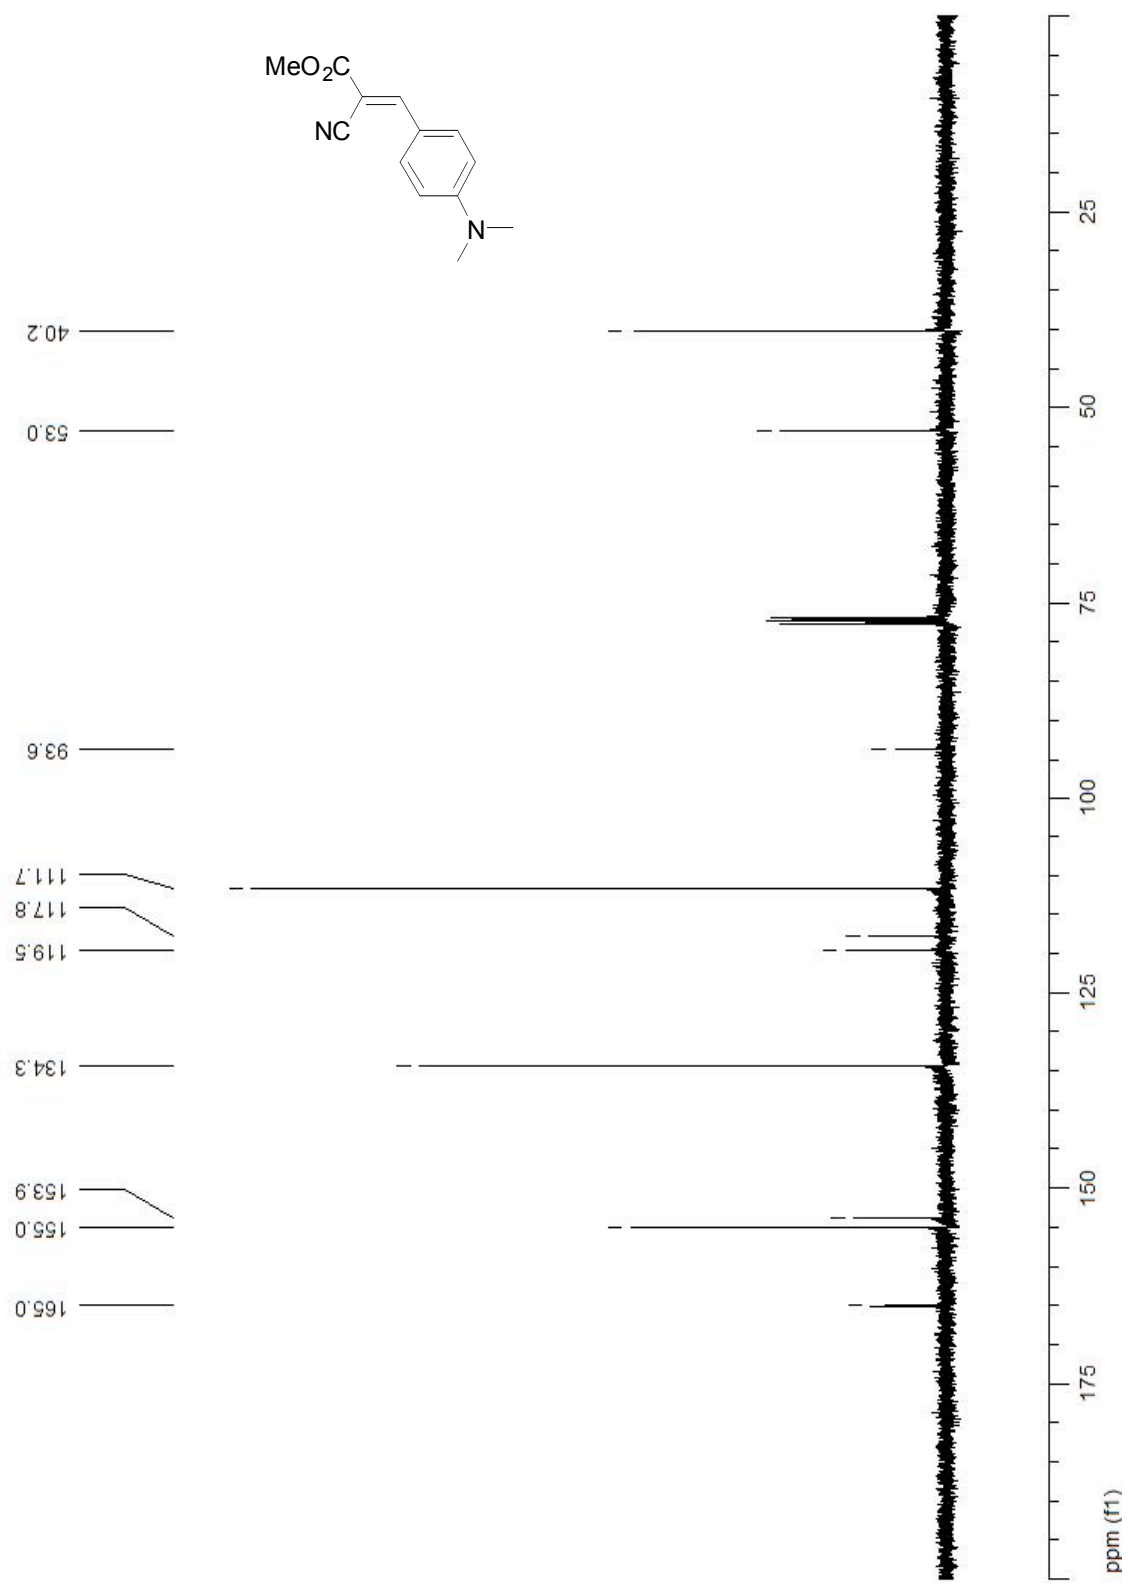

**Spectrum 8.**  $^{13}\text{C}$ NMR ( $\text{CDCl}_3$ , 100MHz) of compound **5d**

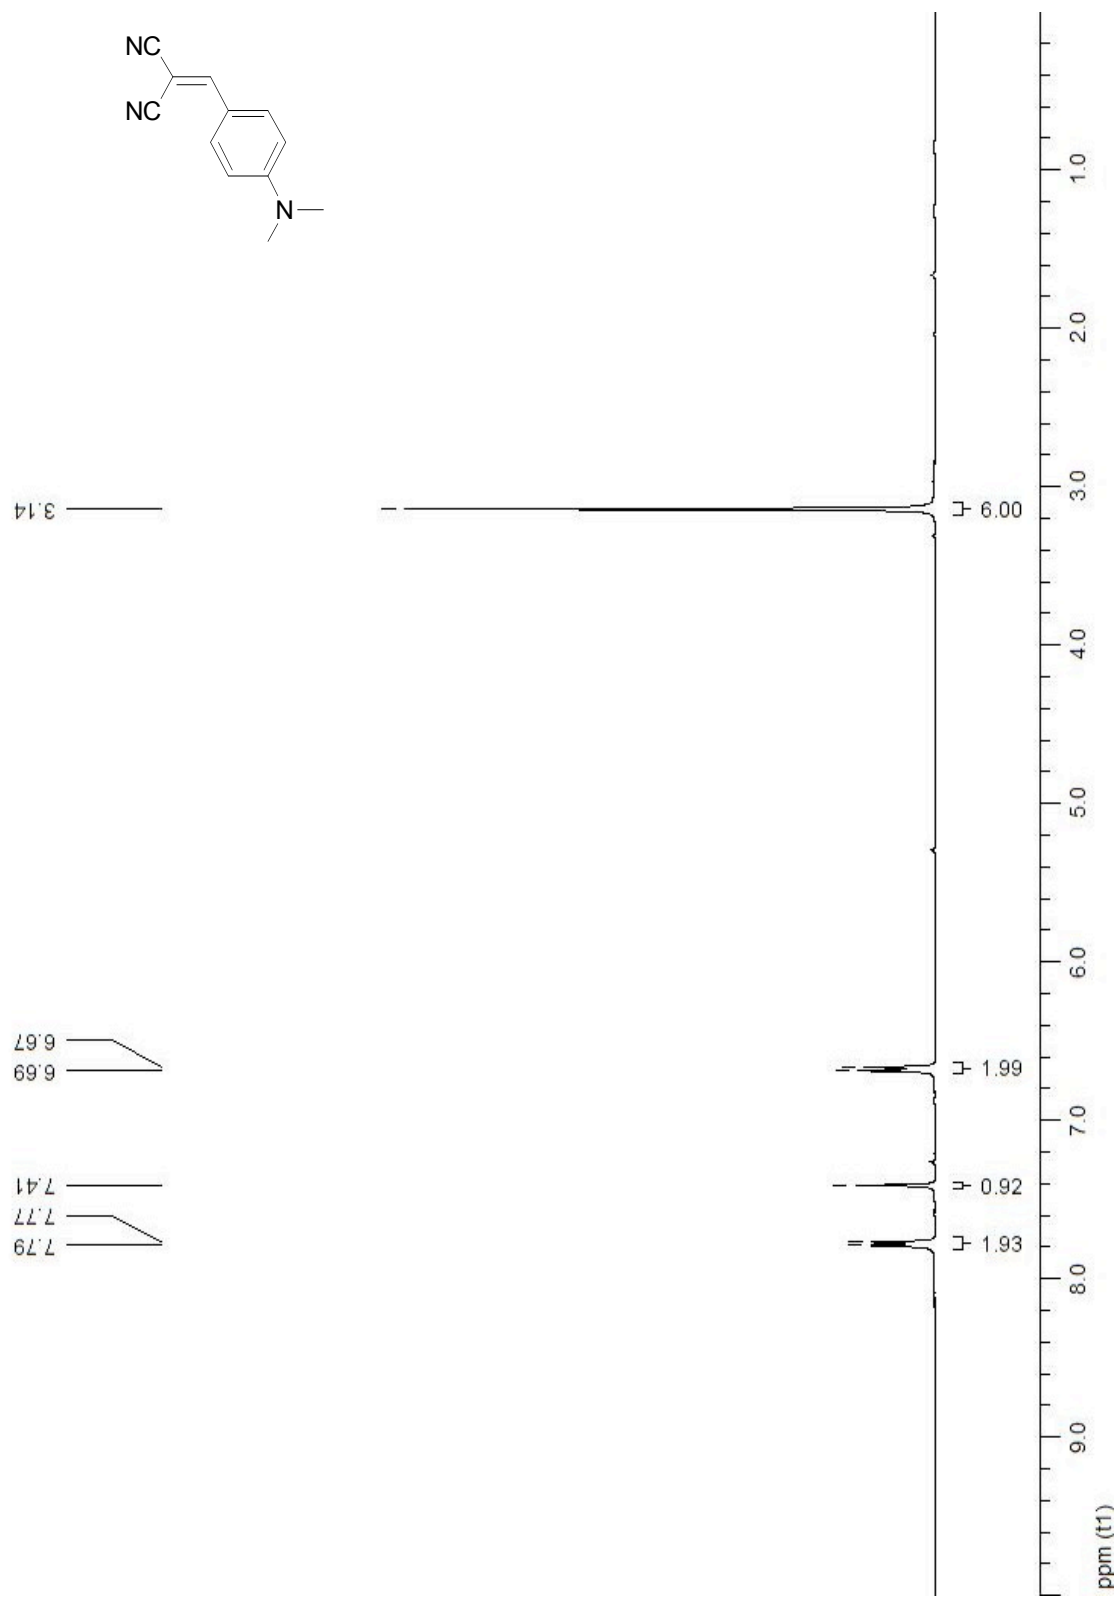

**Spectrum 9.**  $^1\text{H}$ NMR ( $\text{CDCl}_3$ , 400MHz) of compound **5e**

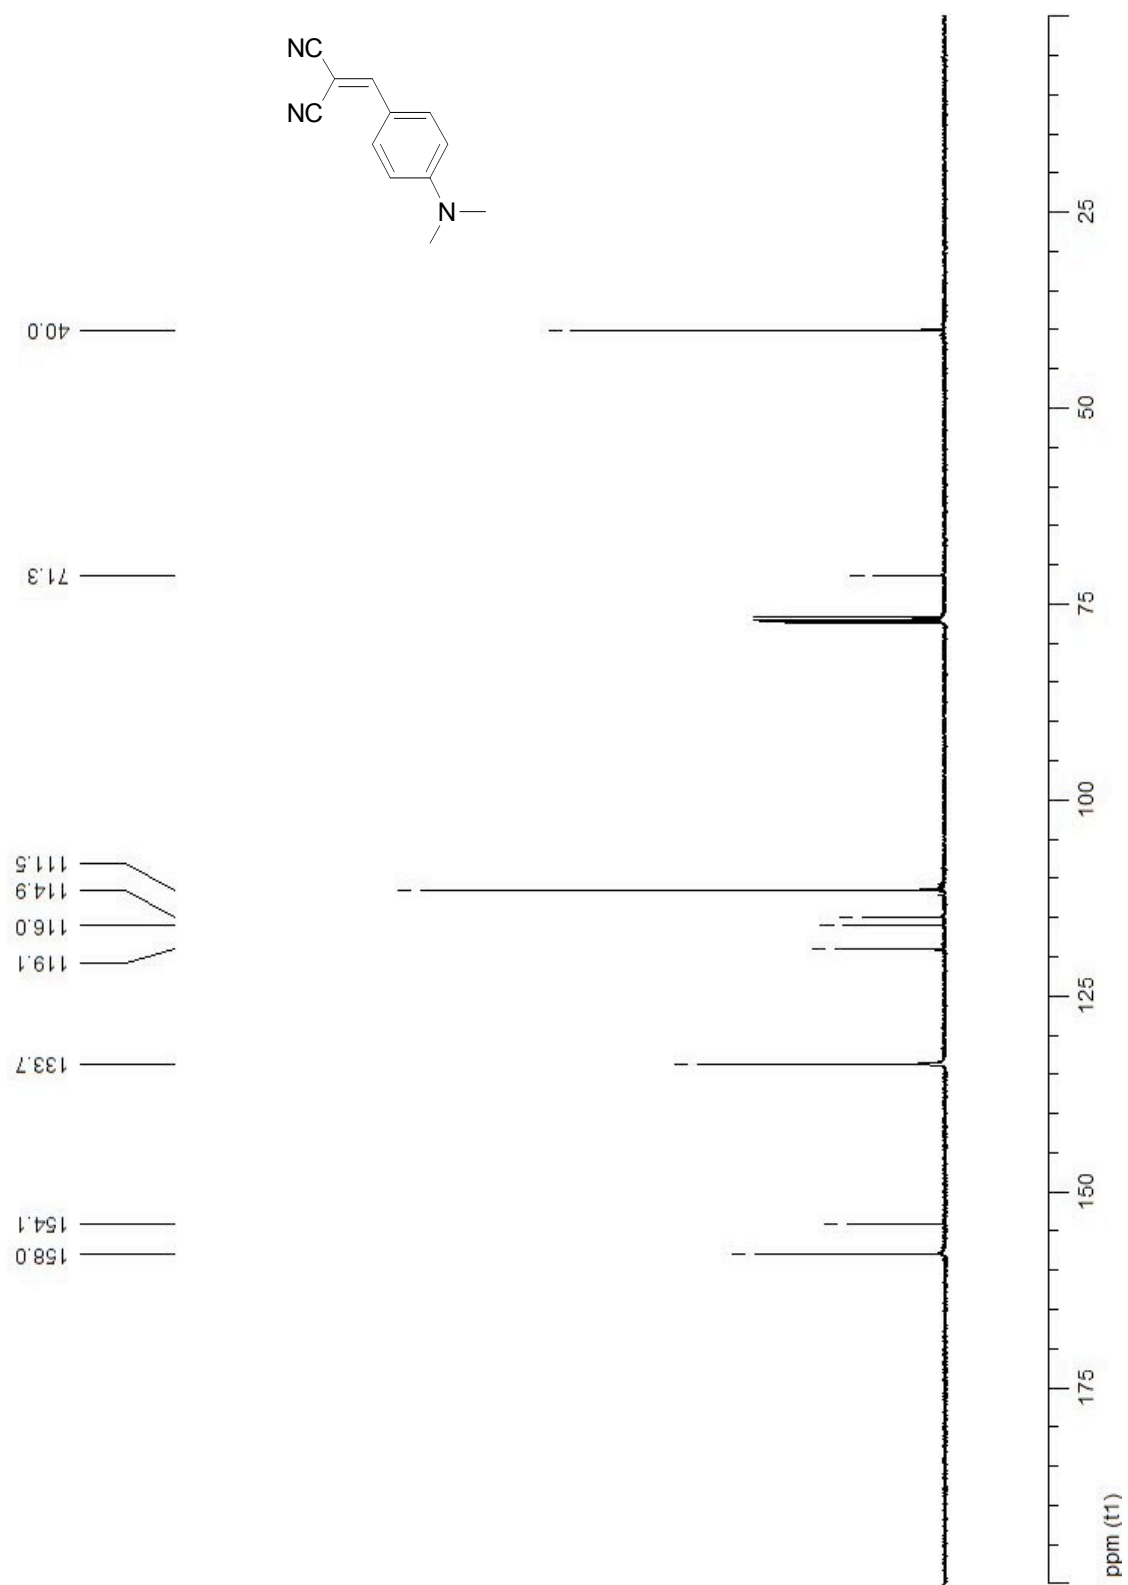

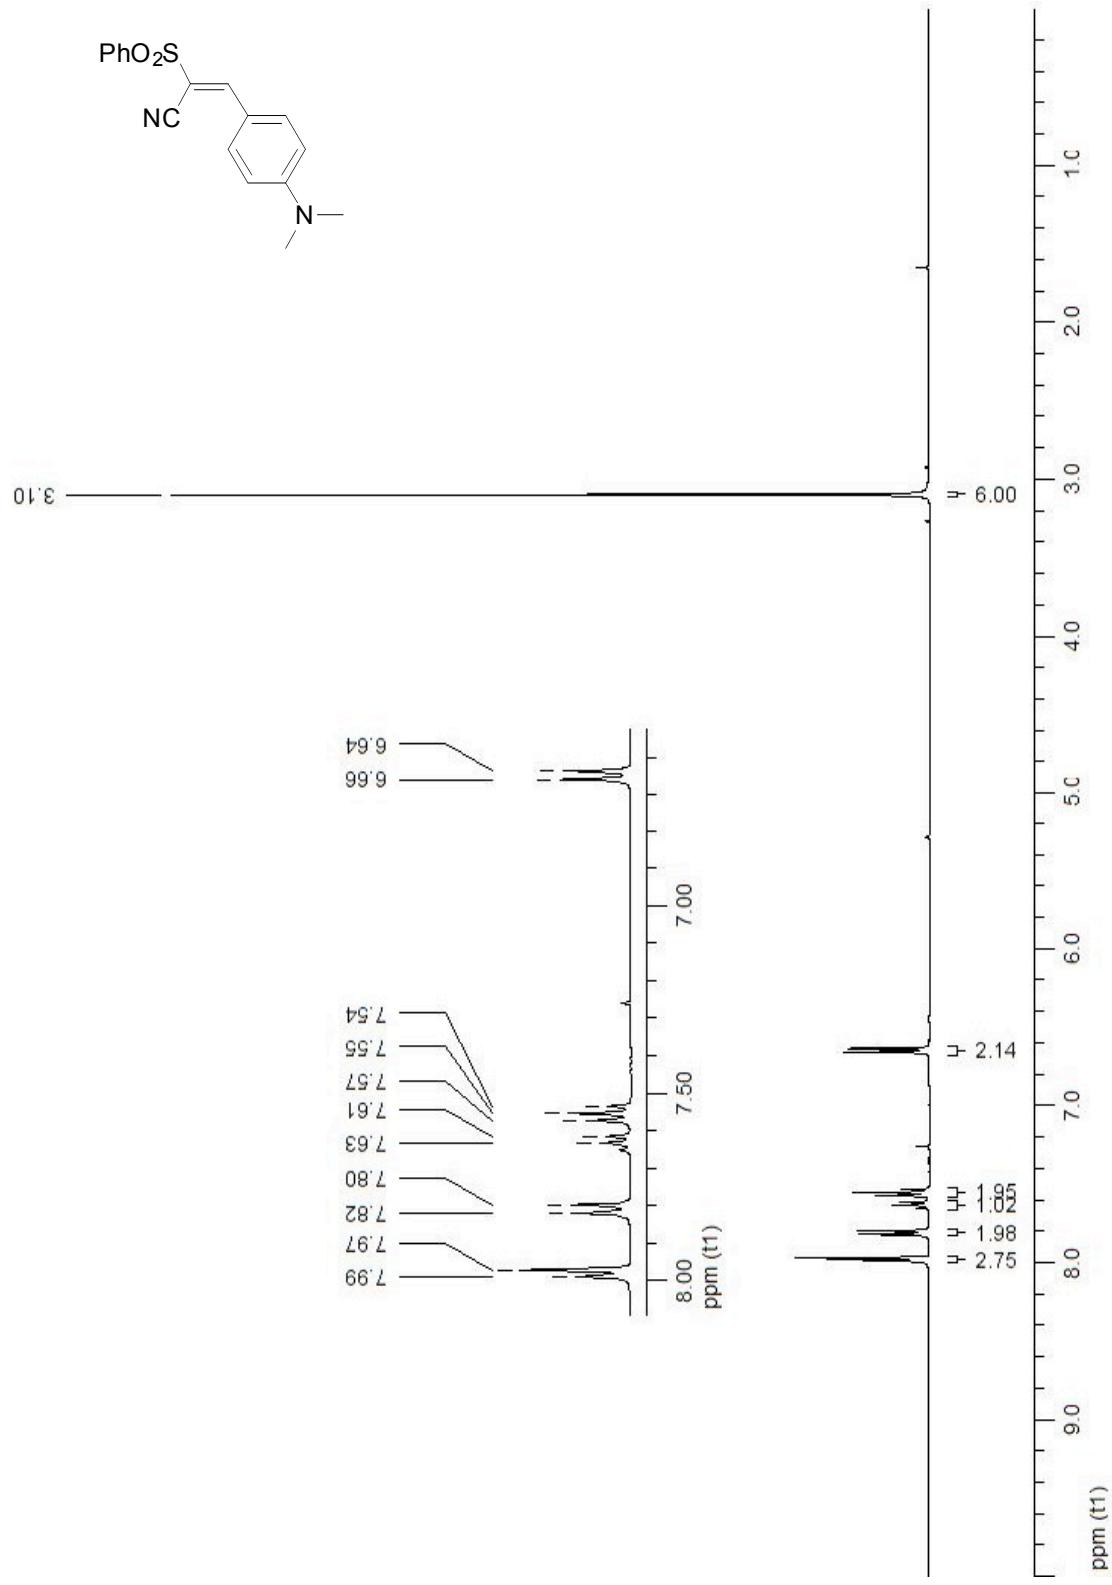

**Spectrum 11.** <sup>1</sup>H NMR (CDCl<sub>3</sub>, 100MHz) of compound **5f**

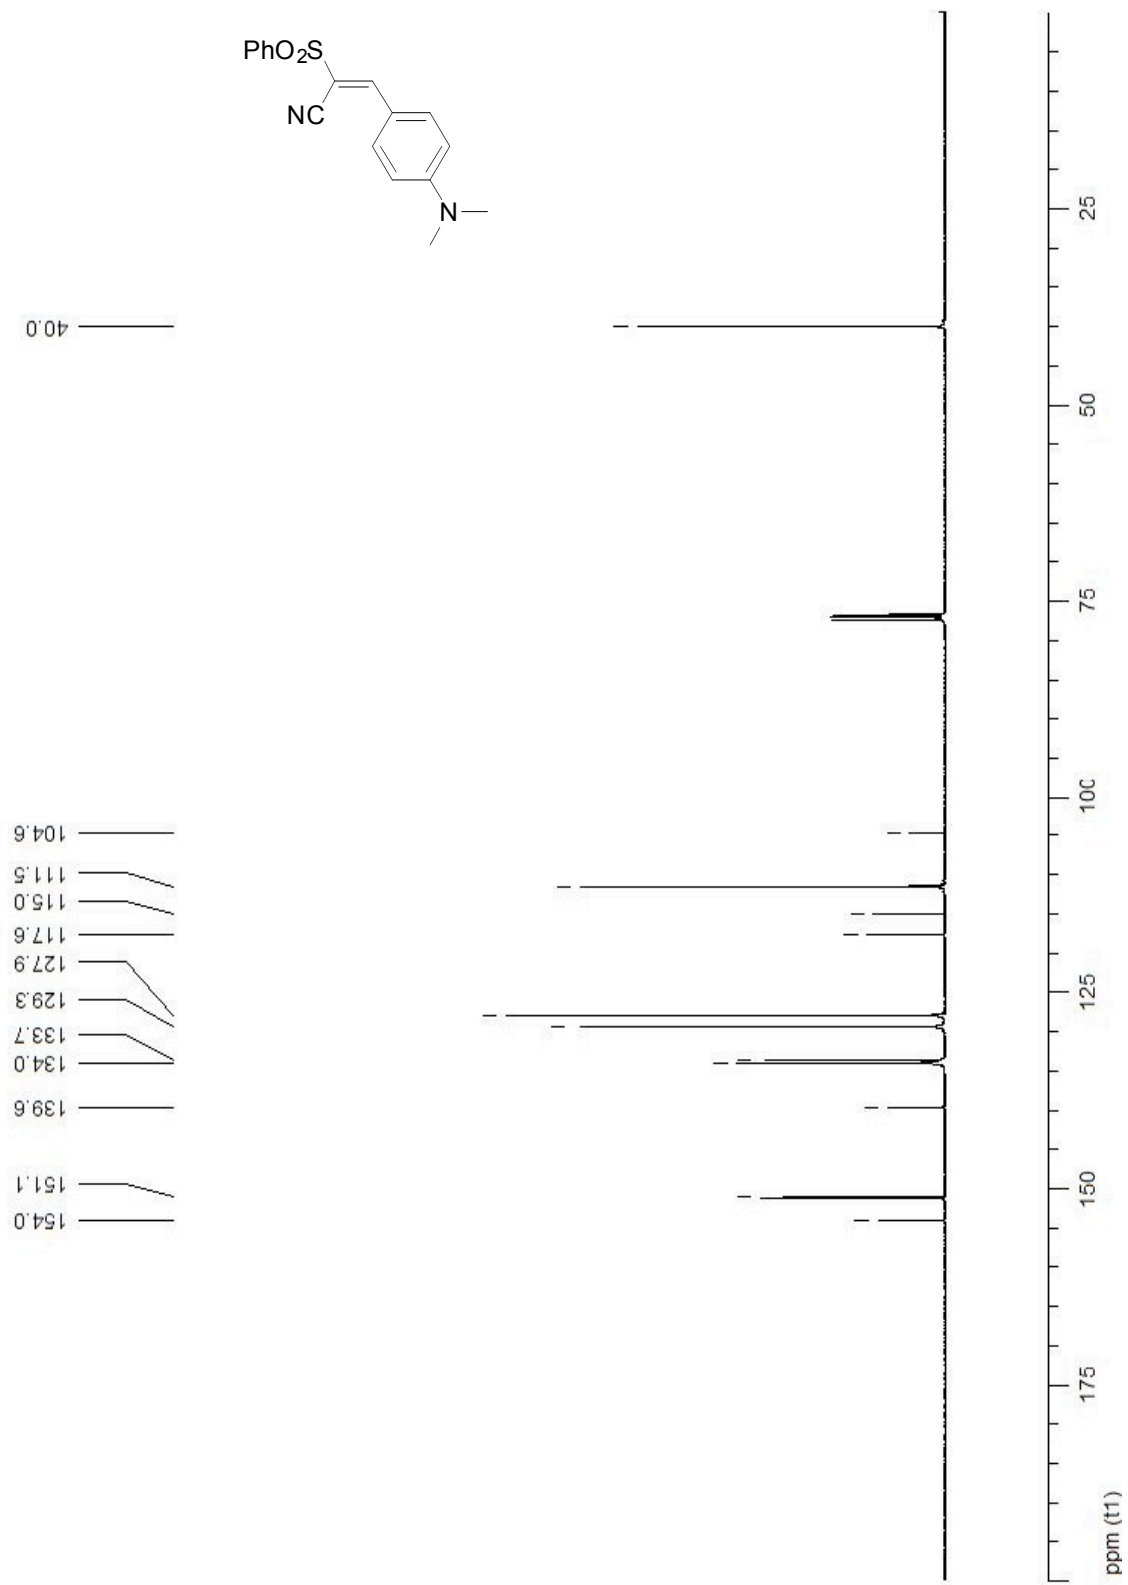

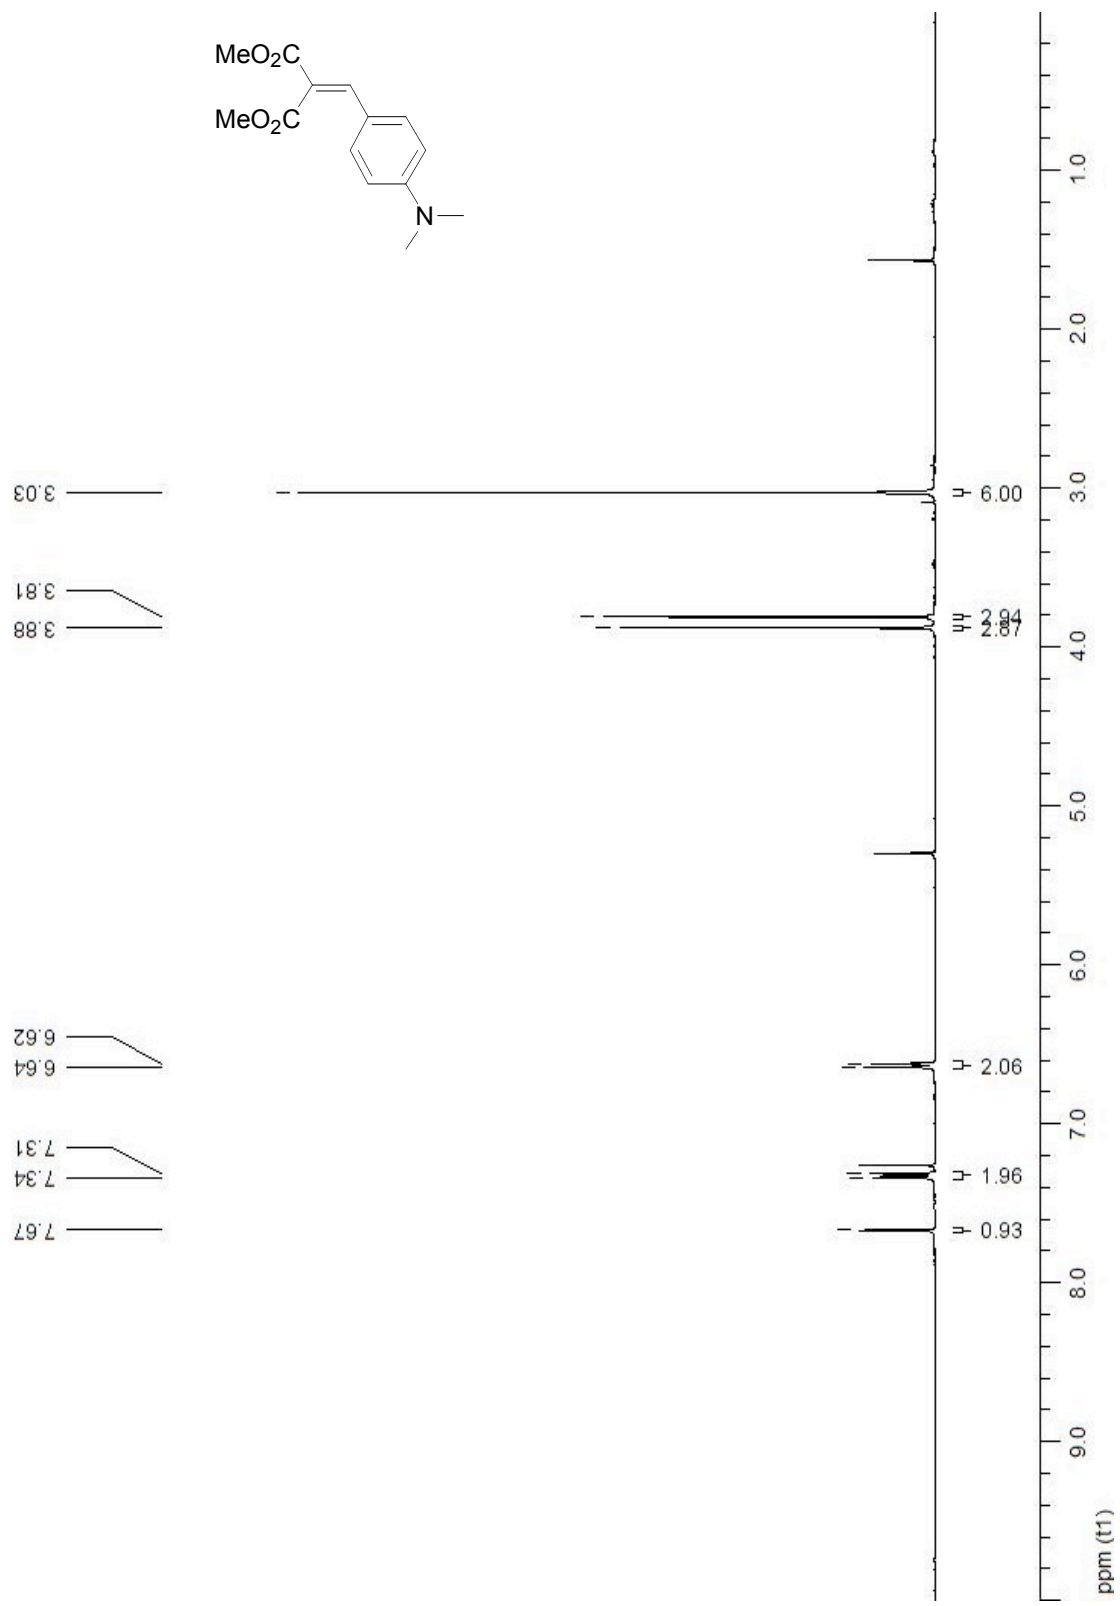

**Spectrum 13.** <sup>1</sup>H NMR (CDCl<sub>3</sub>, 400MHz) of compound **5g**

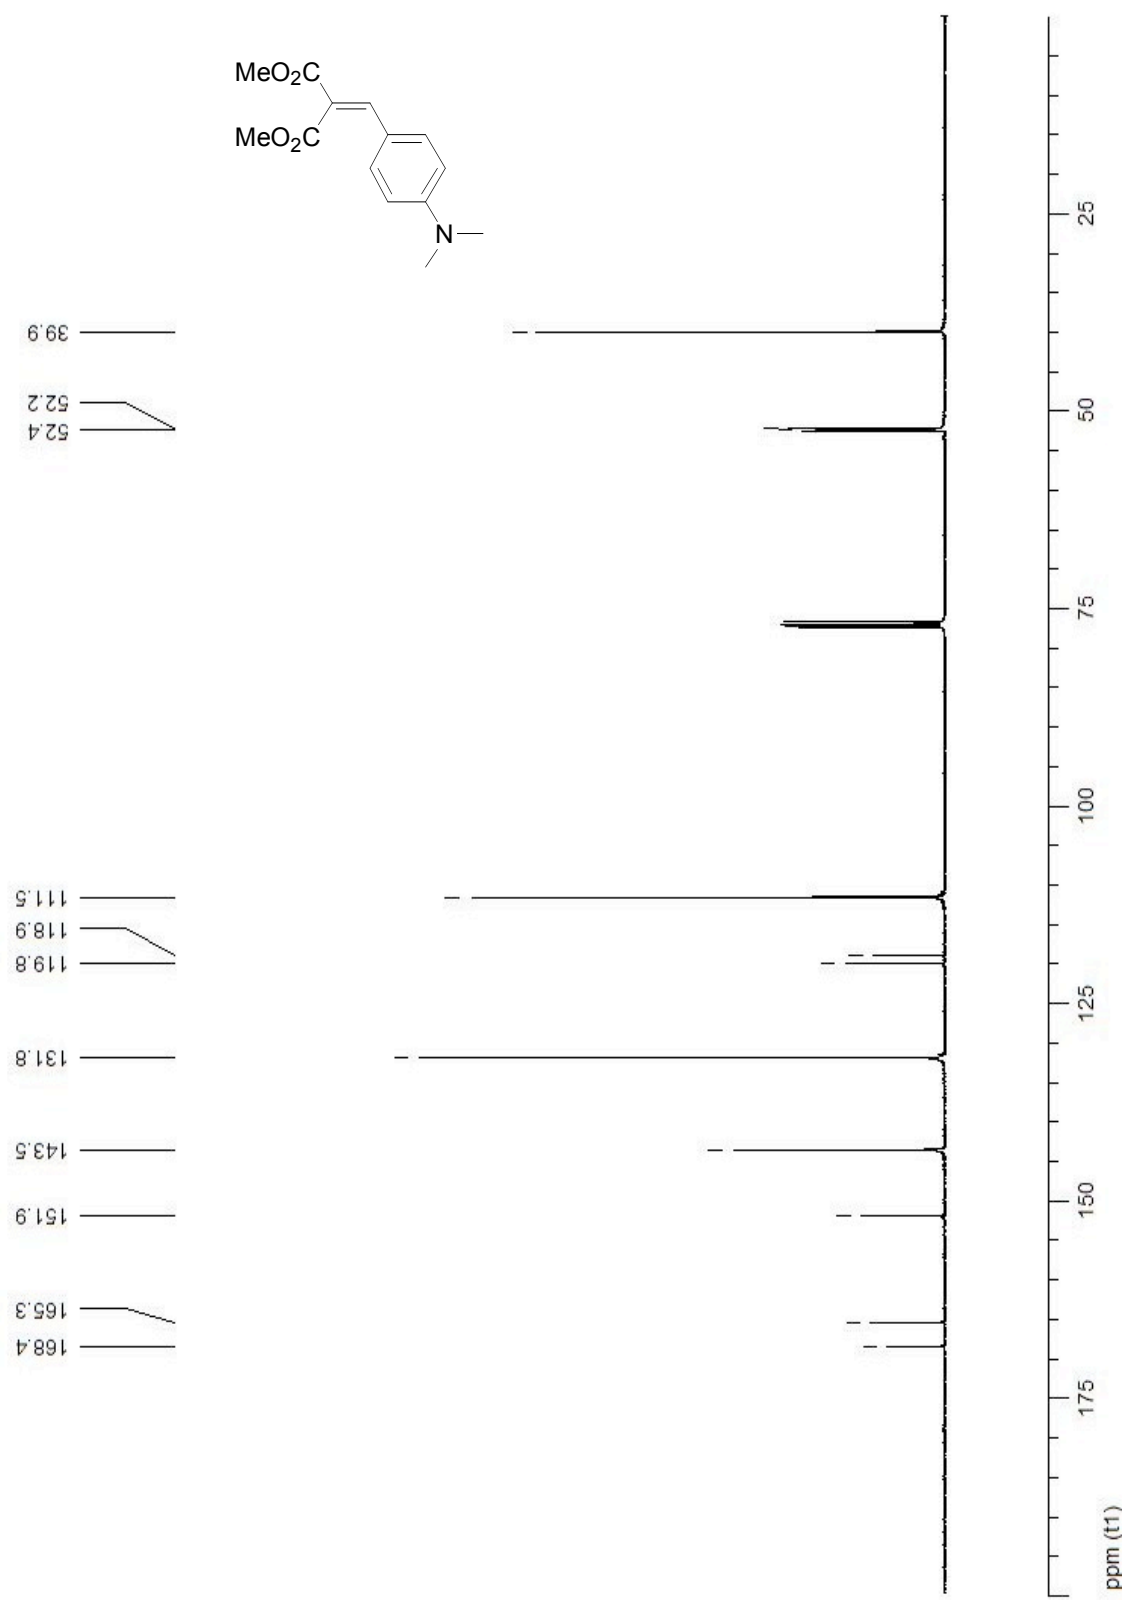

**Spectrum 14.**  $^{13}\text{C}$ NMR ( $\text{CDCl}_3$ , 100MHz) of compound **5g**

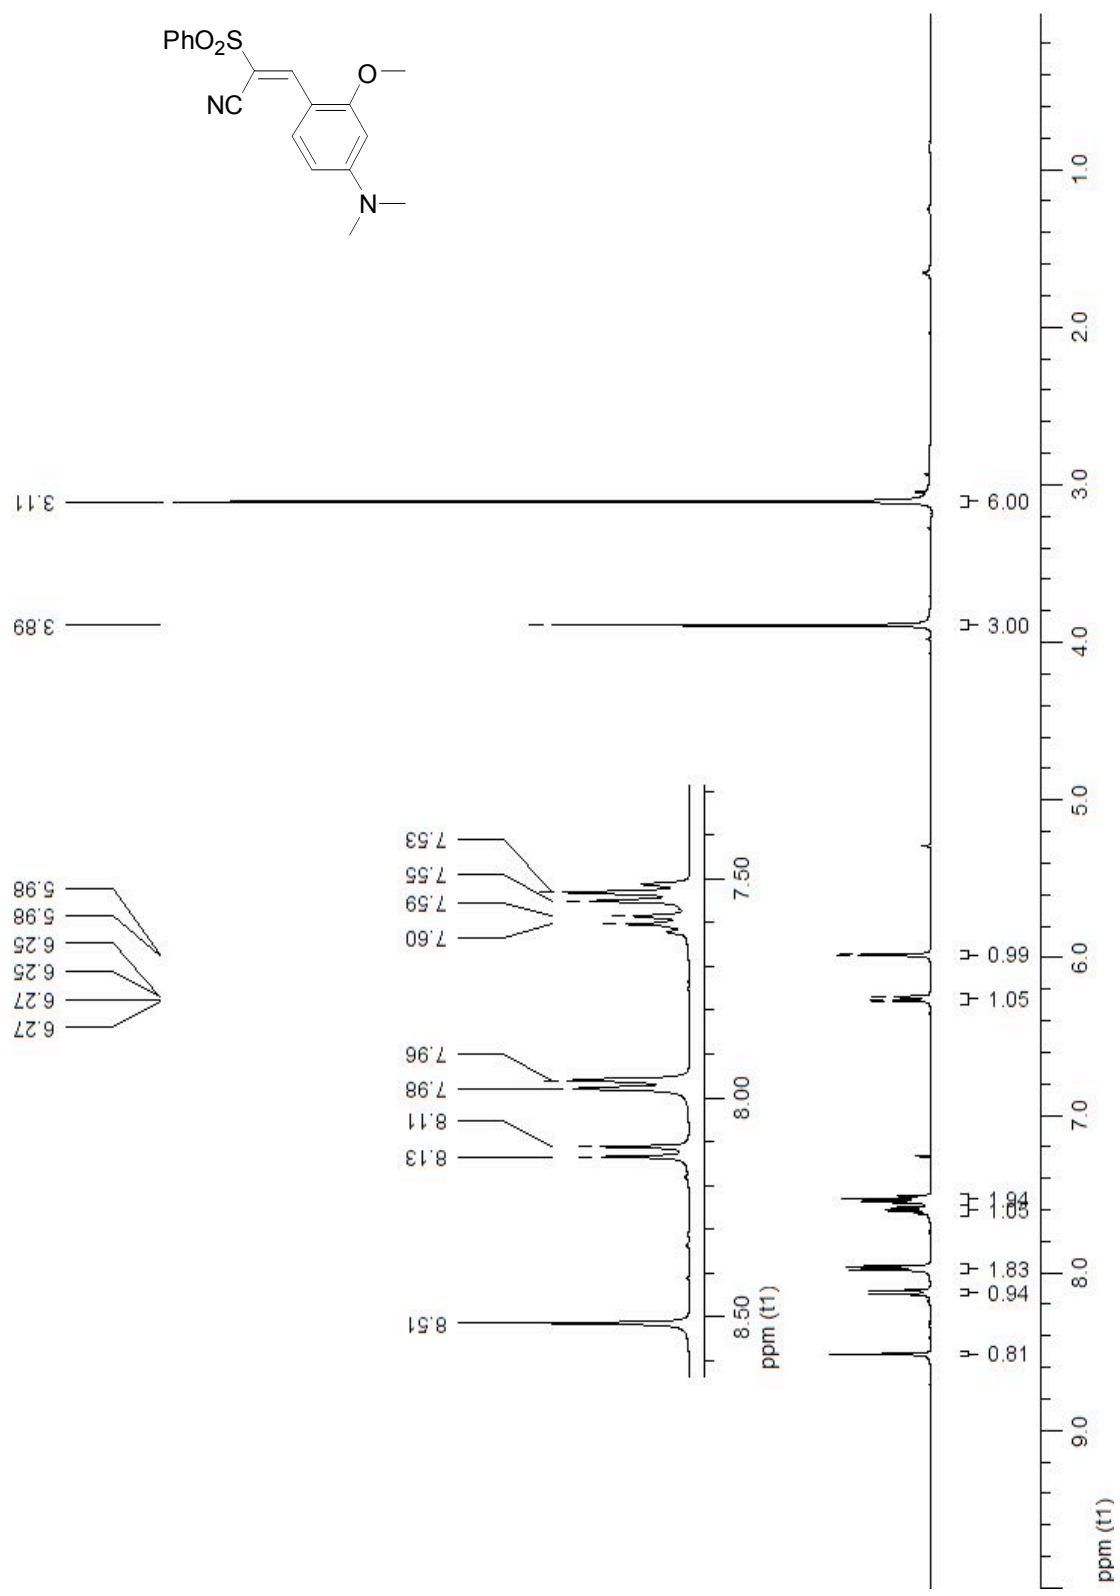

**Spectrum 15.** <sup>1</sup>H NMR (CDCl<sub>3</sub>, 400MHz) of compound **5h**



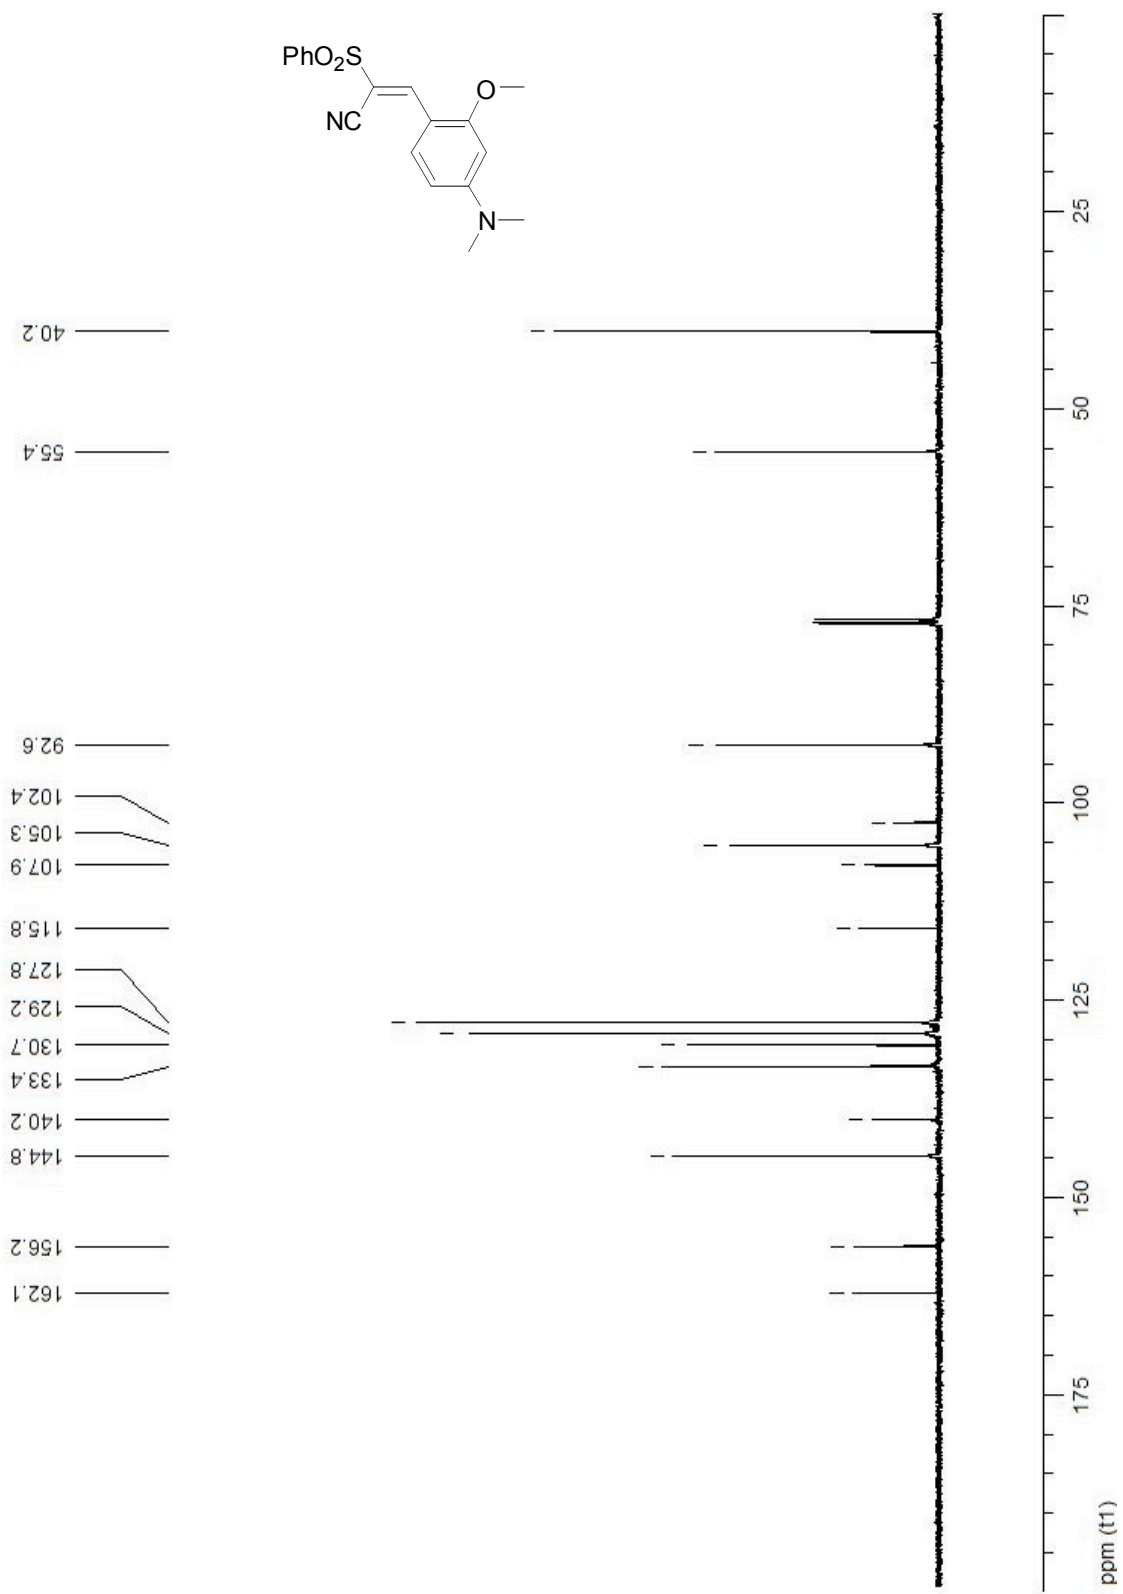

**Spectrum 16.**  $^{13}\text{C}$ NMR ( $\text{CDCl}_3$ , 100MHz) of compound **5h**

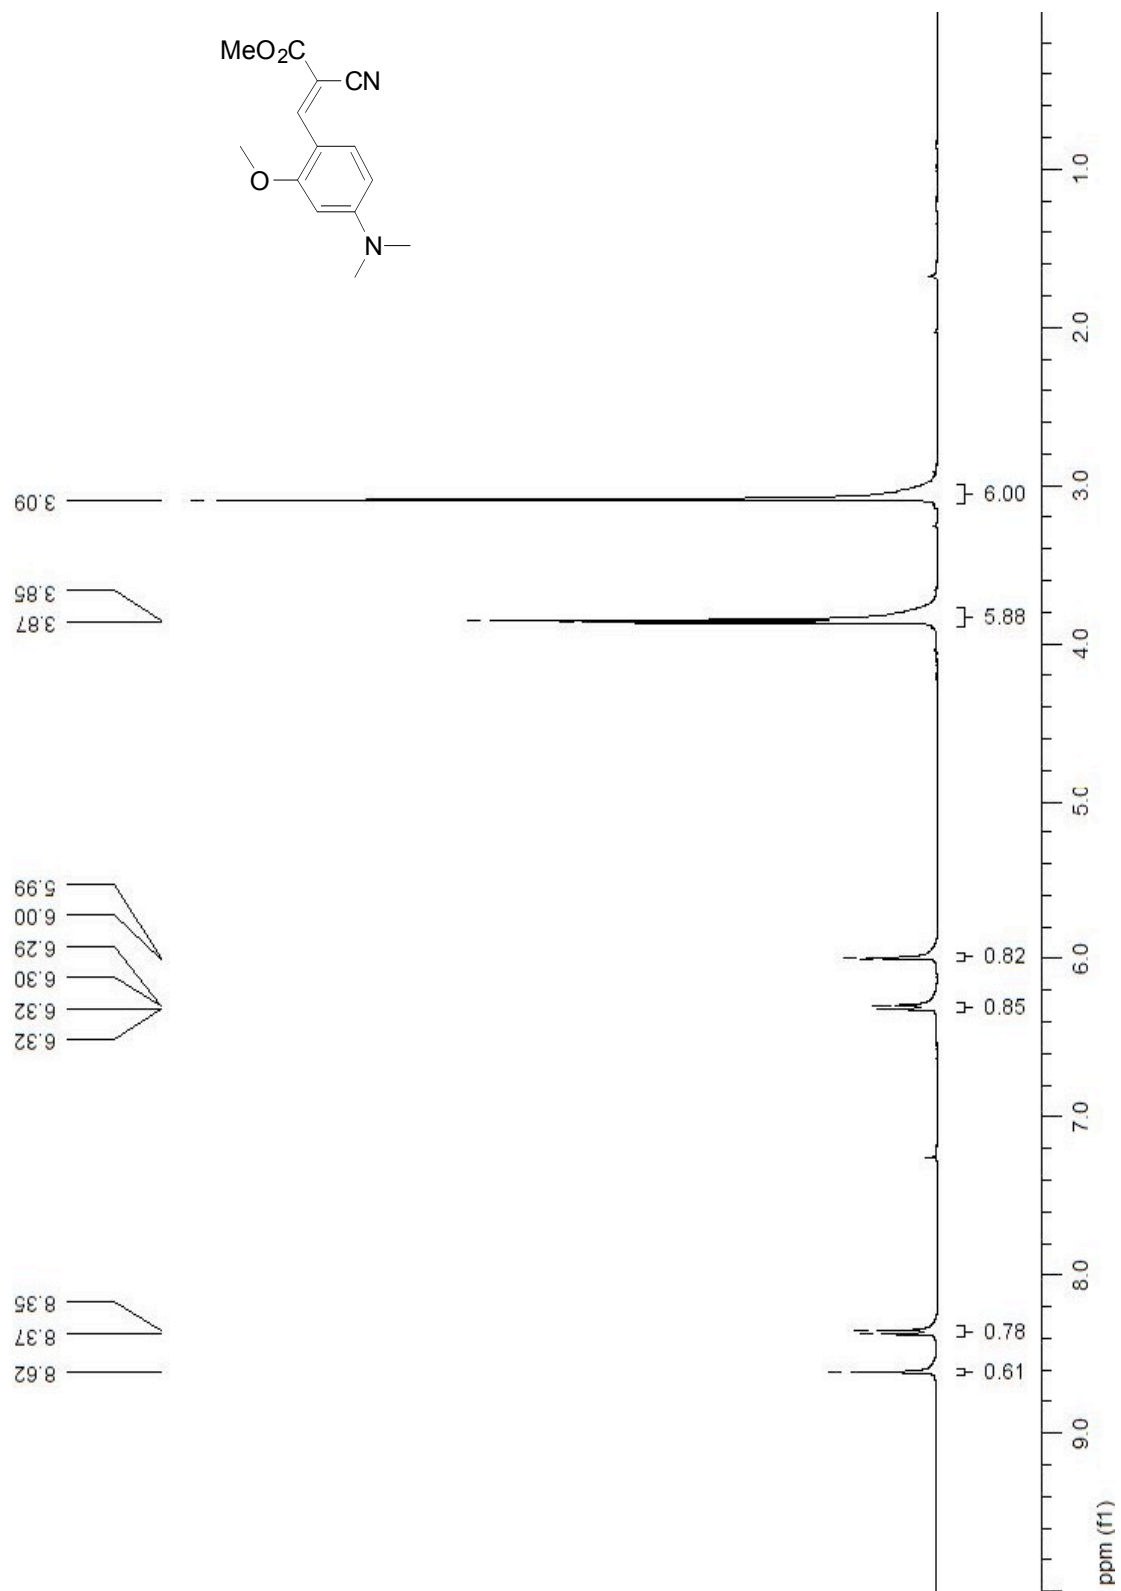

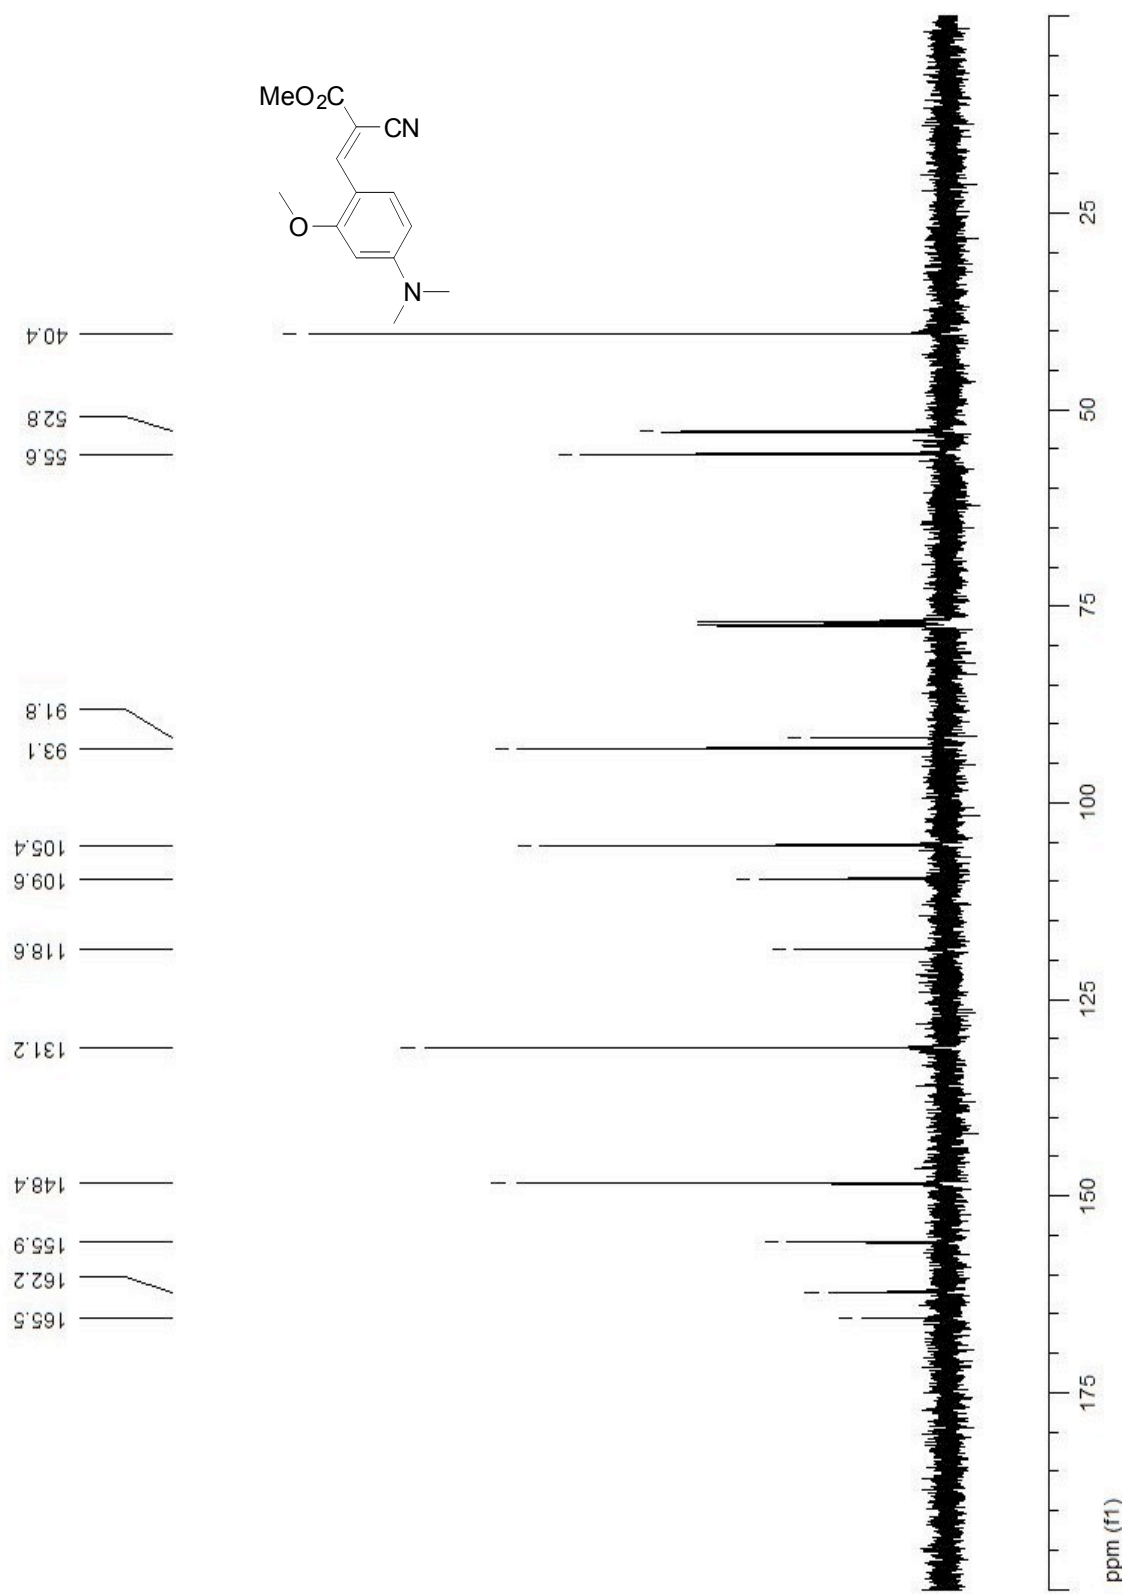

**Spectrum 18.** <sup>13</sup>CNMR (CDCl<sub>3</sub>, 100MHz) of compound **5i**

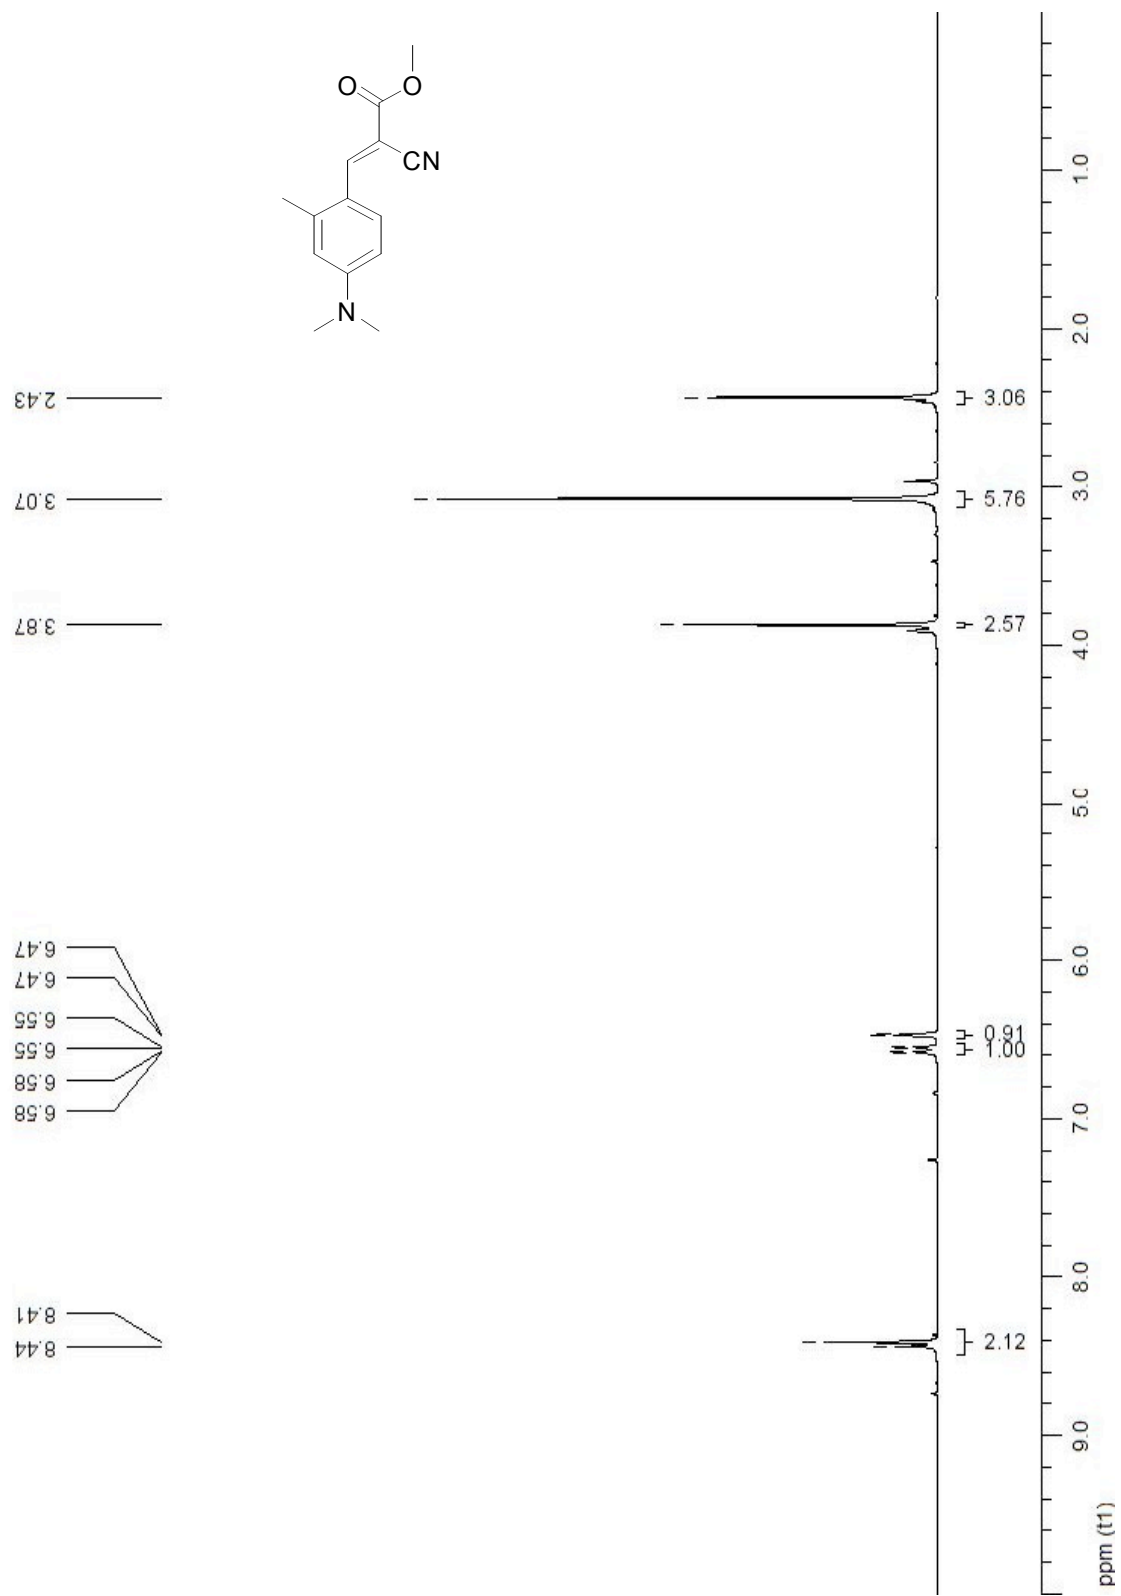

**Spectrum 19.**  $^1\text{H}$ NMR ( $\text{CDCl}_3$ , 300MHz) of compound **5j**

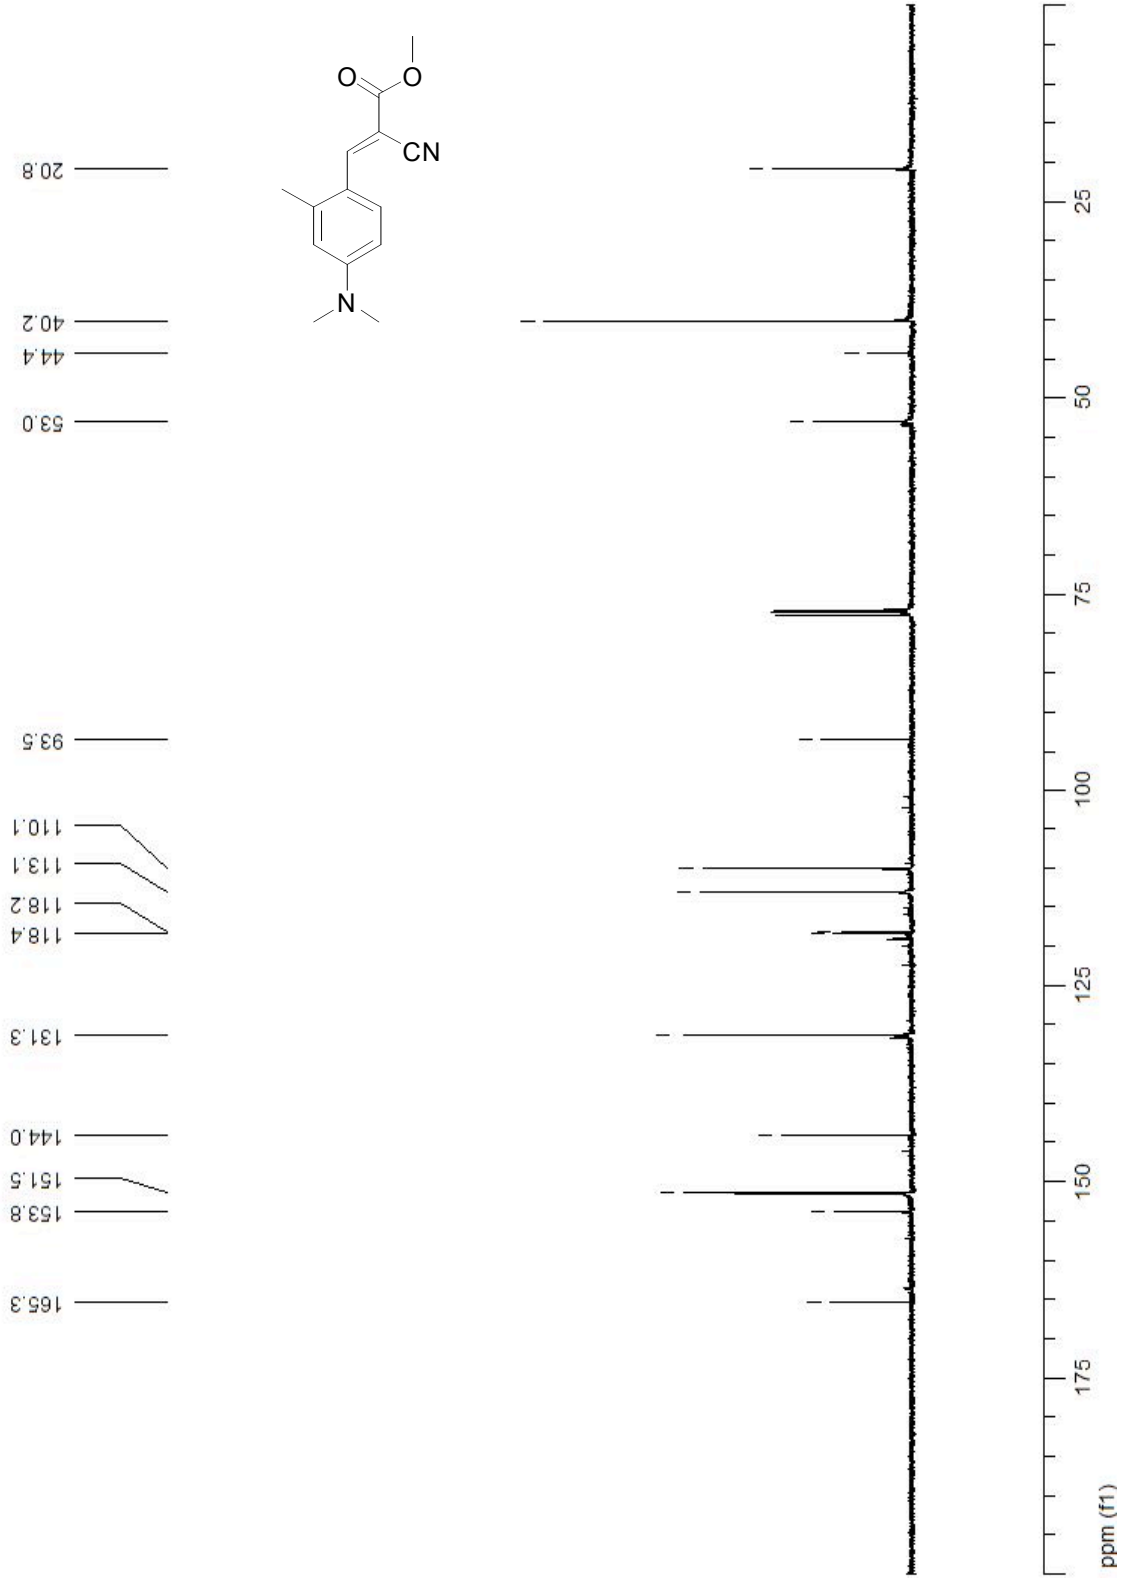

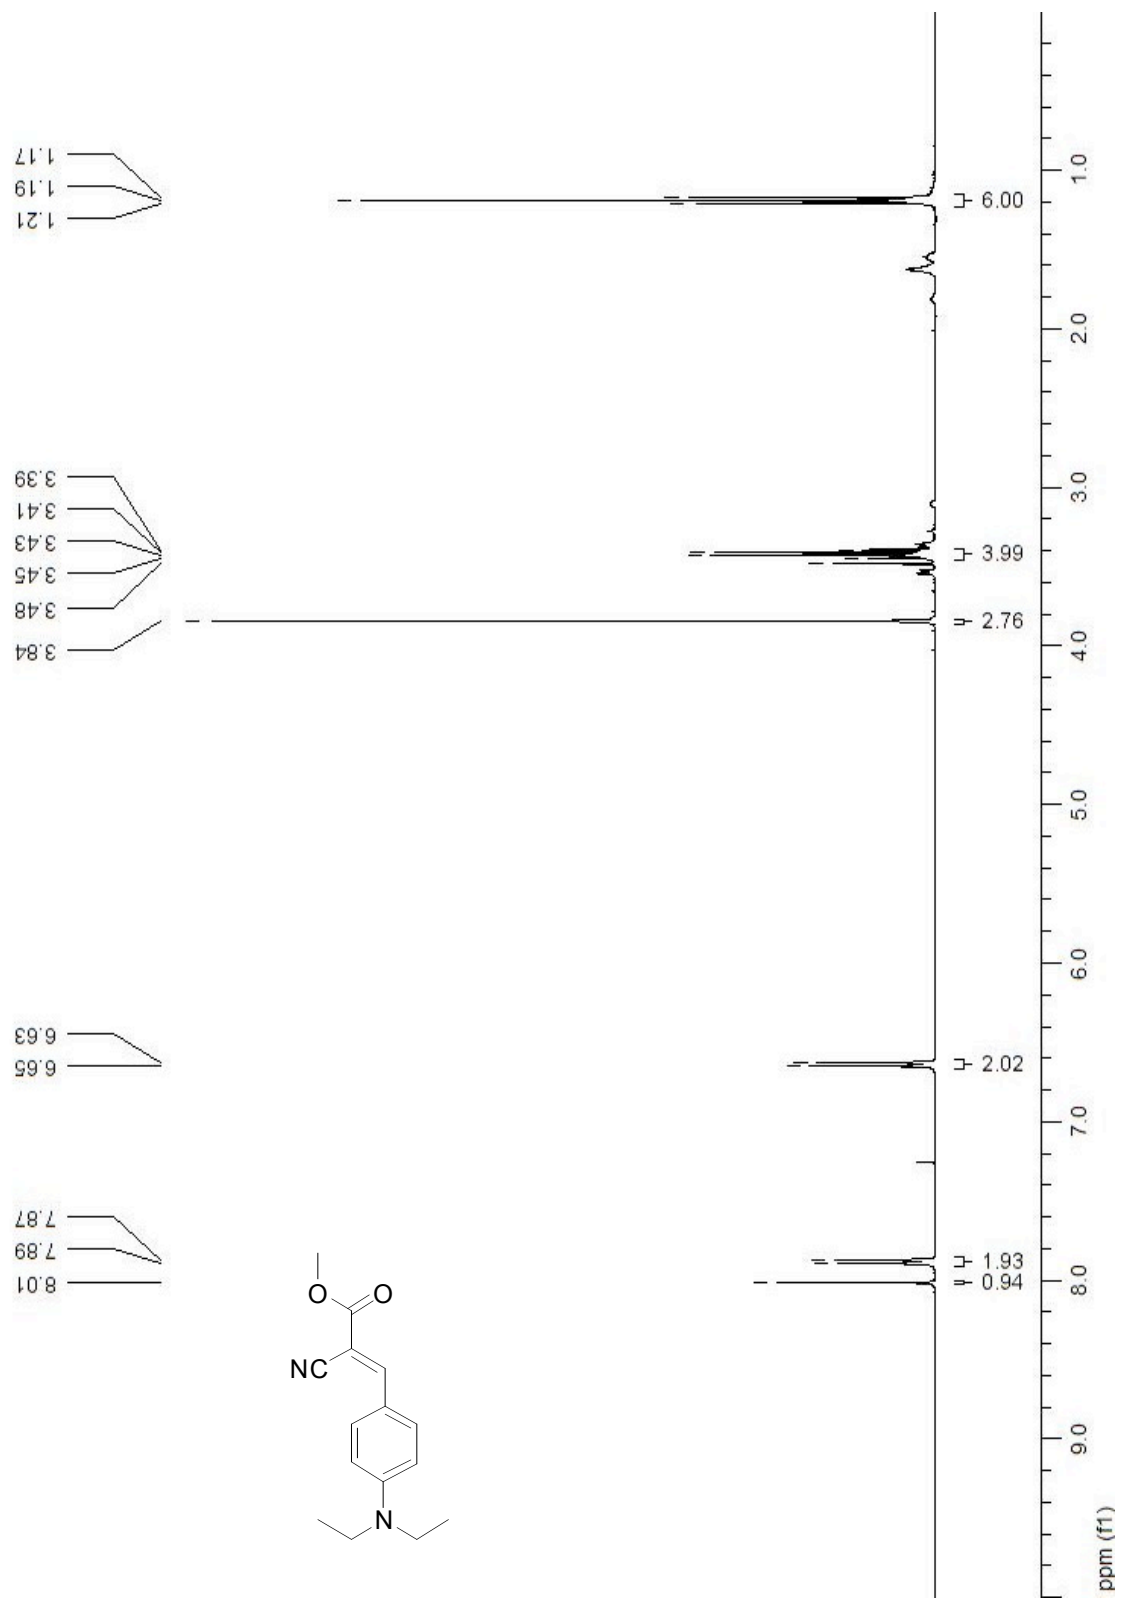

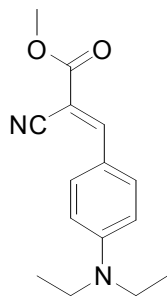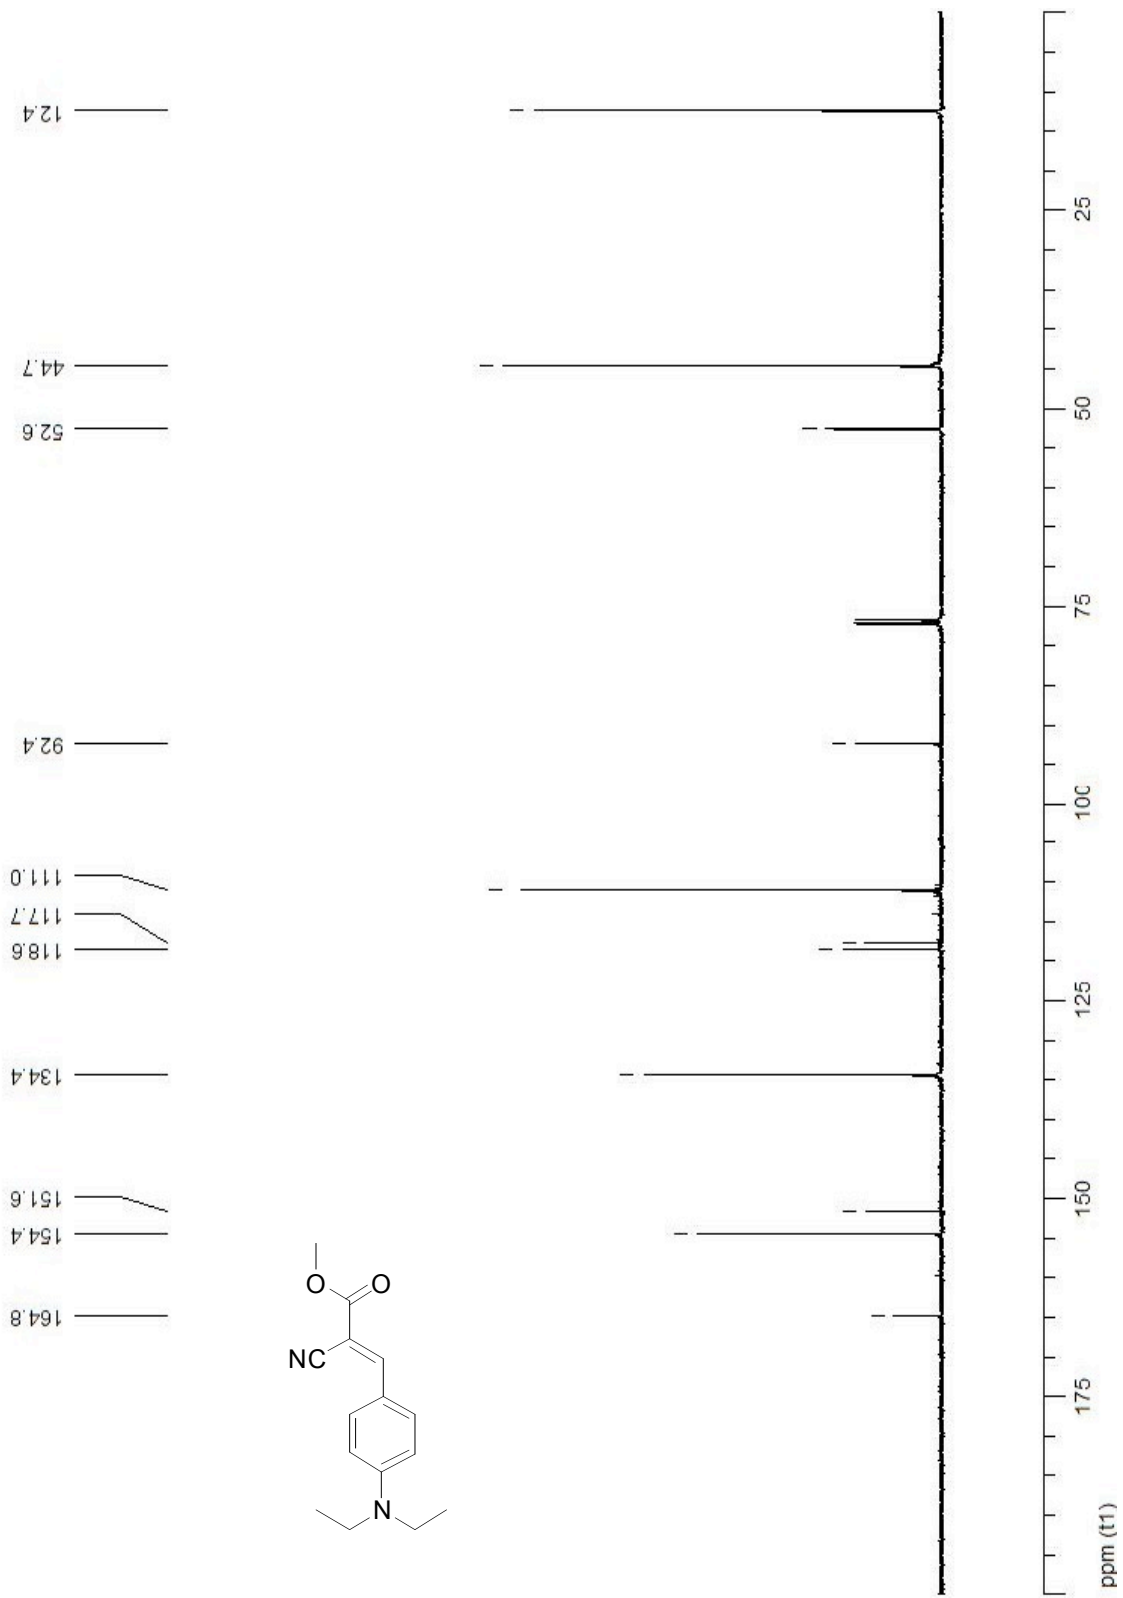

**Spectrum 22.**  $^{13}\text{C}$  NMR ( $\text{CDCl}_3$ , 100MHz) of compound **5k**

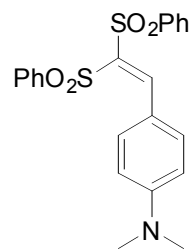

3.09

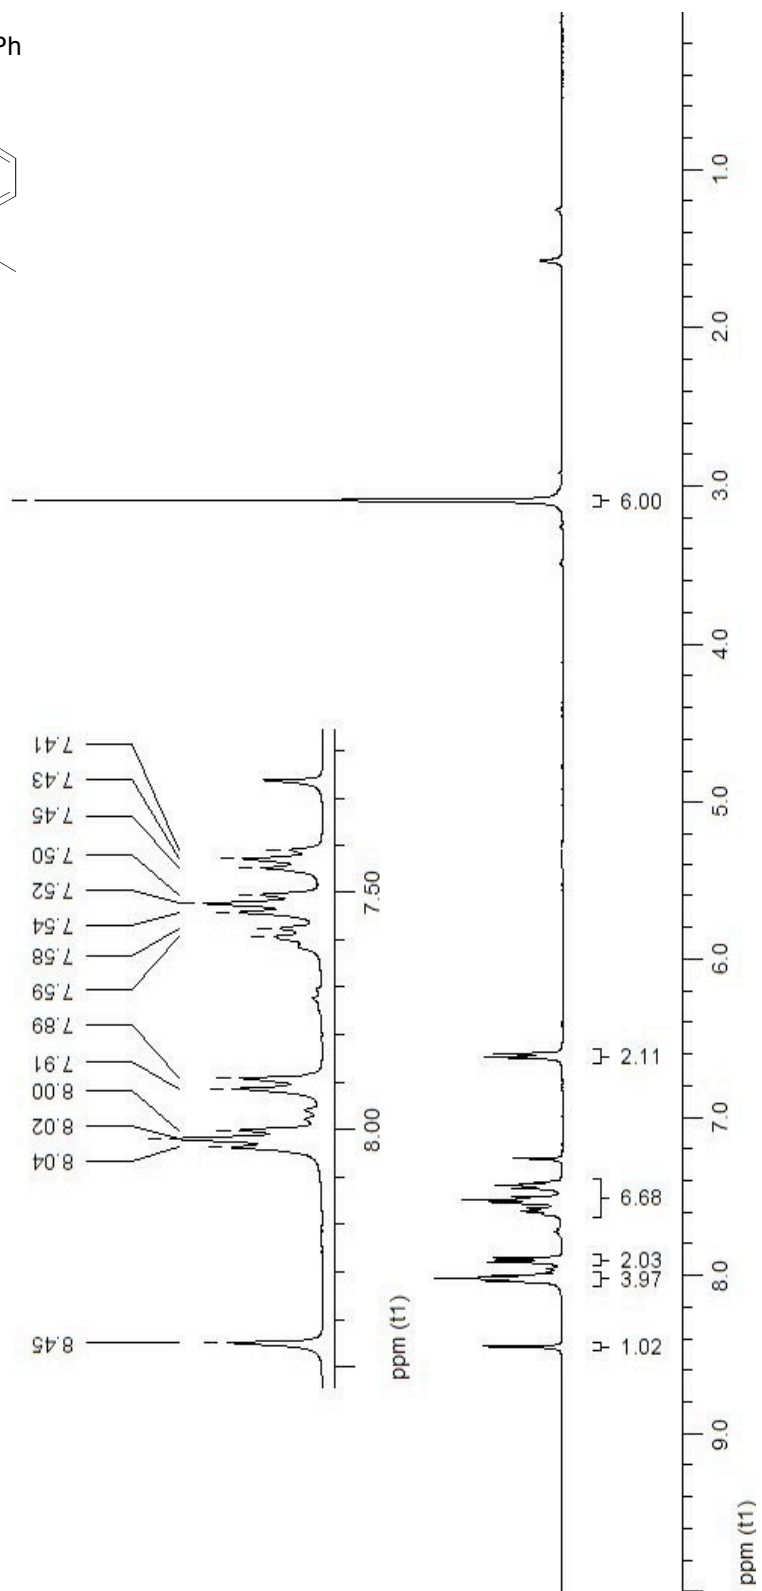

**Spectrum 23.** <sup>1</sup>H NMR (CDCl<sub>3</sub>, 400 MHz) of compound 51



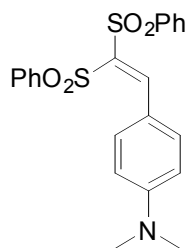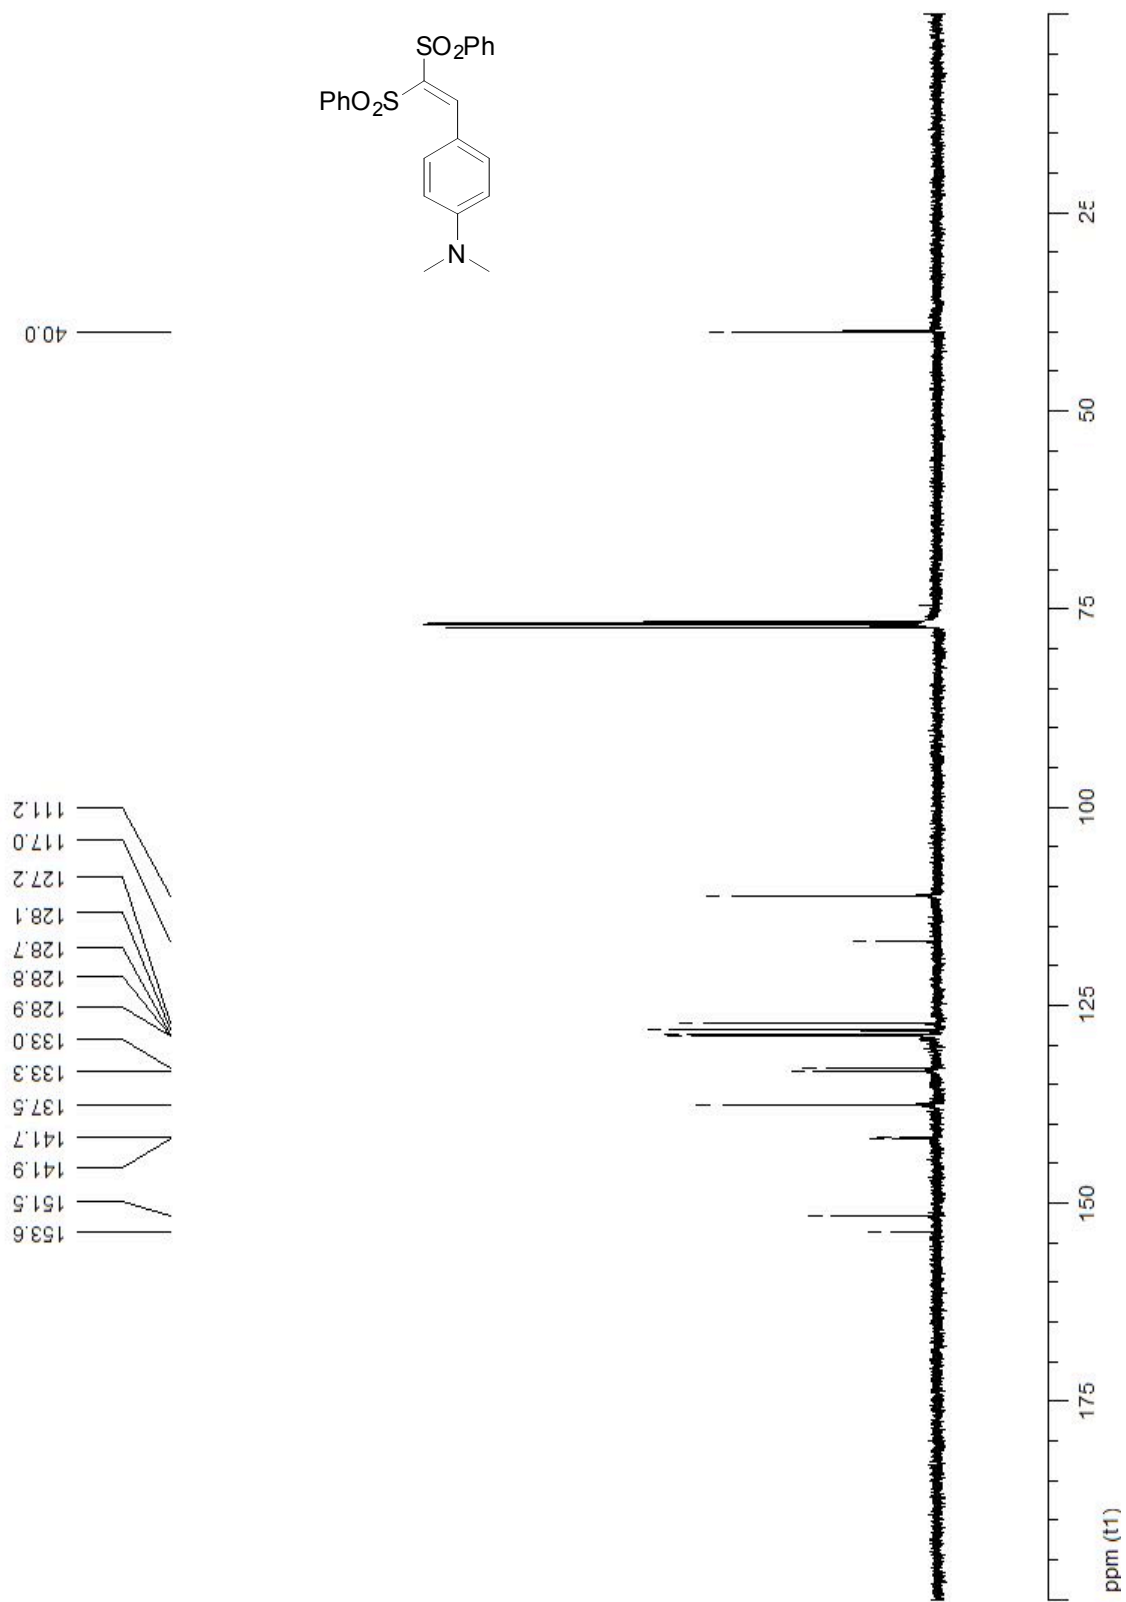

**Spectrum 24.** <sup>13</sup>CNMR (CDCl<sub>3</sub>, 100MHz) of compound **5I**

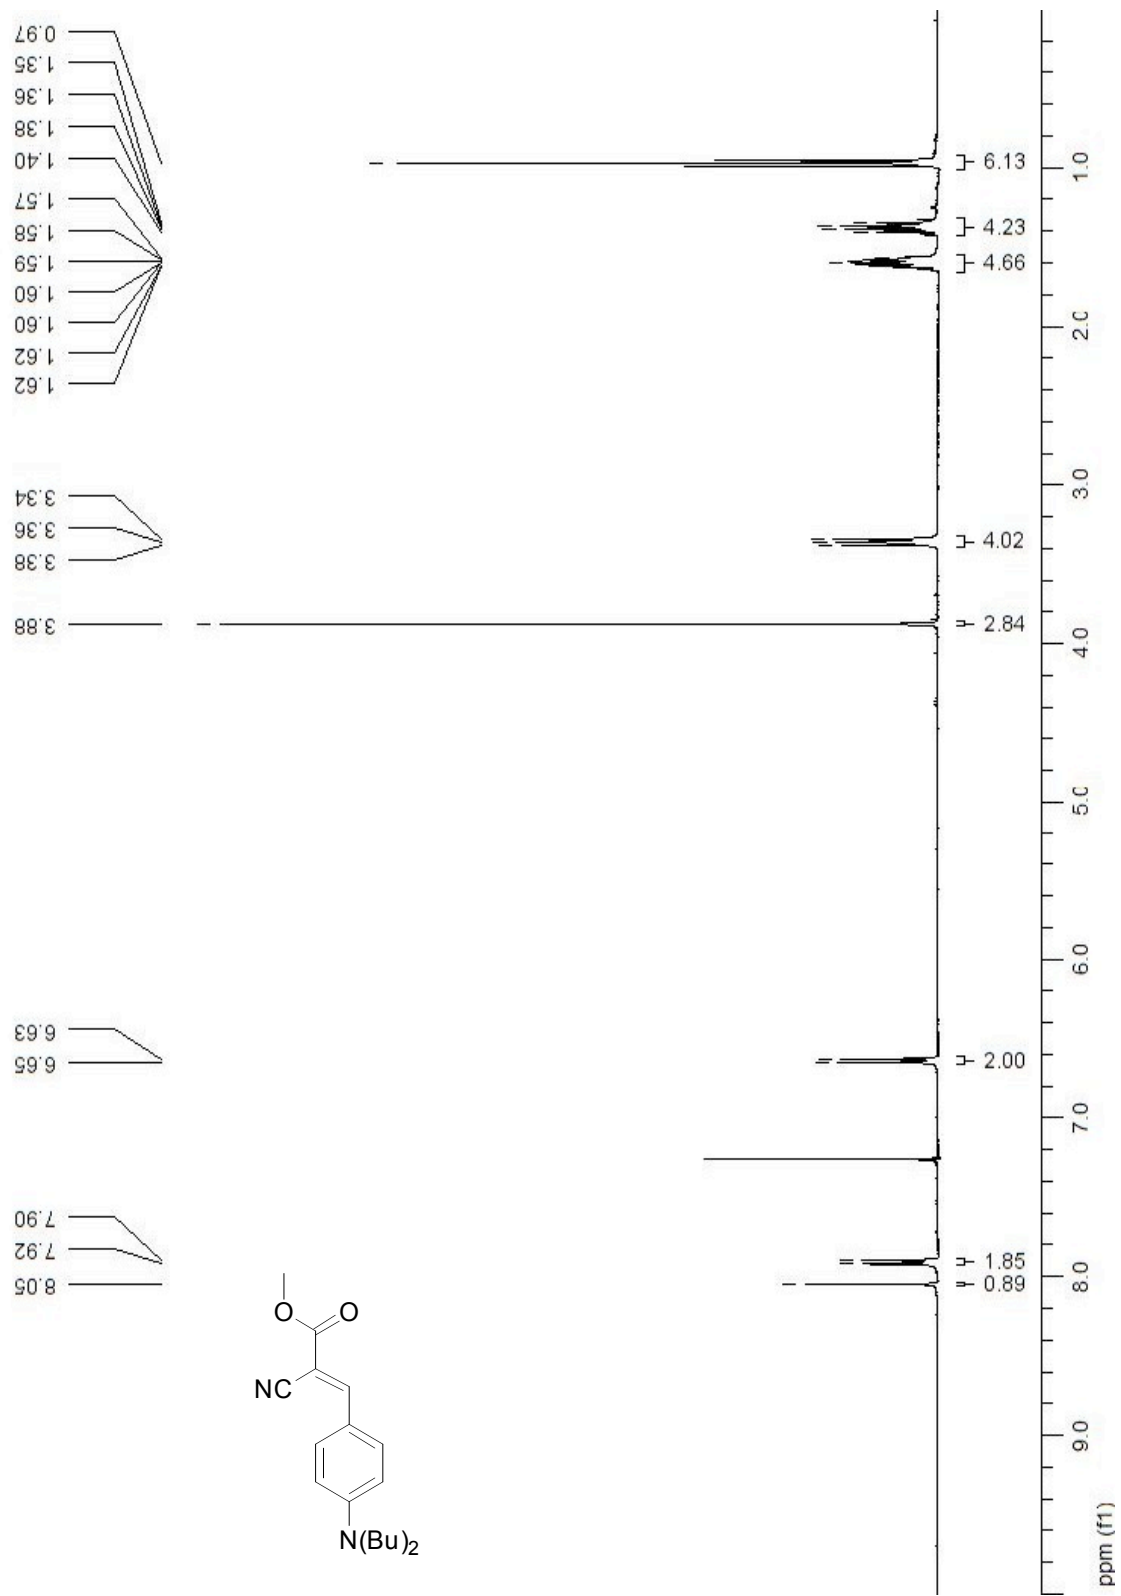

**Spectrum 25.**  $^1\text{H}$ NMR ( $\text{CDCl}_3$ , 400MHz) of compound **5m**

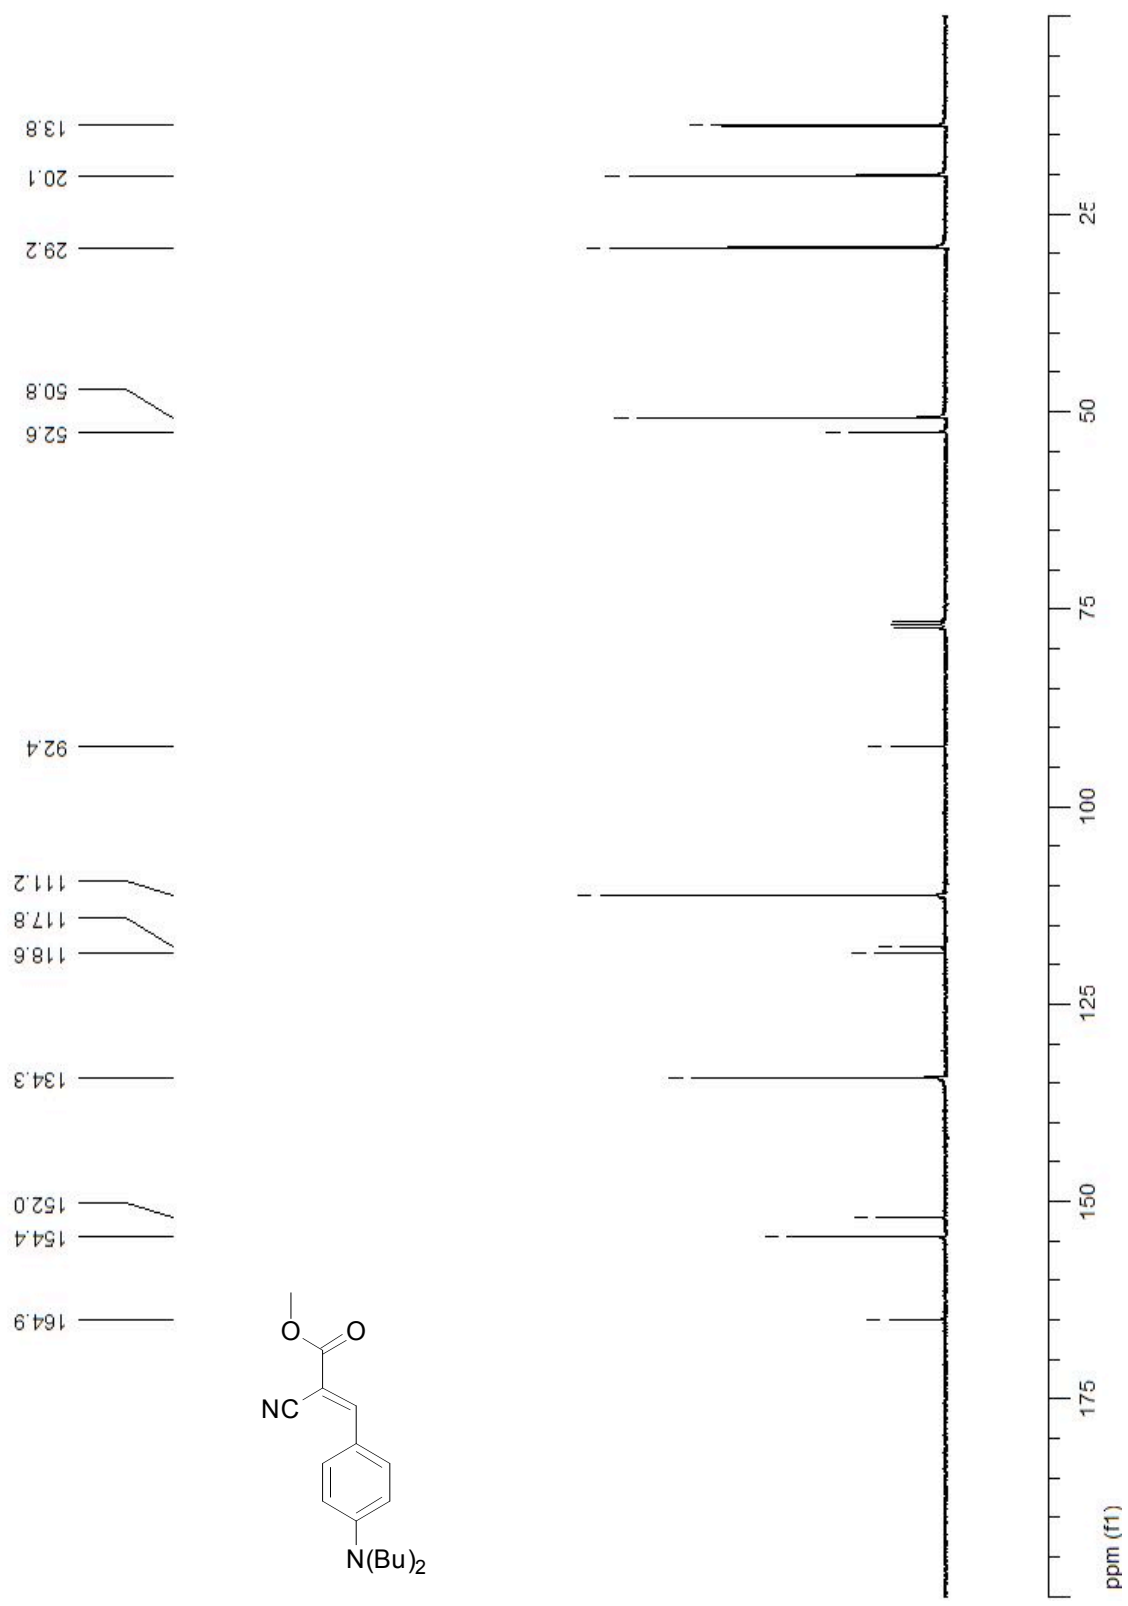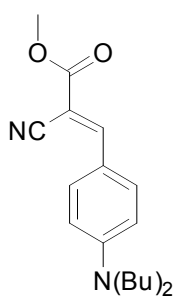

**Spectrum 26.** <sup>13</sup>CNMR (CDCl<sub>3</sub>, 100MHz) of compound **5m**

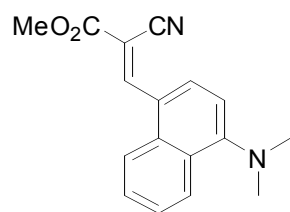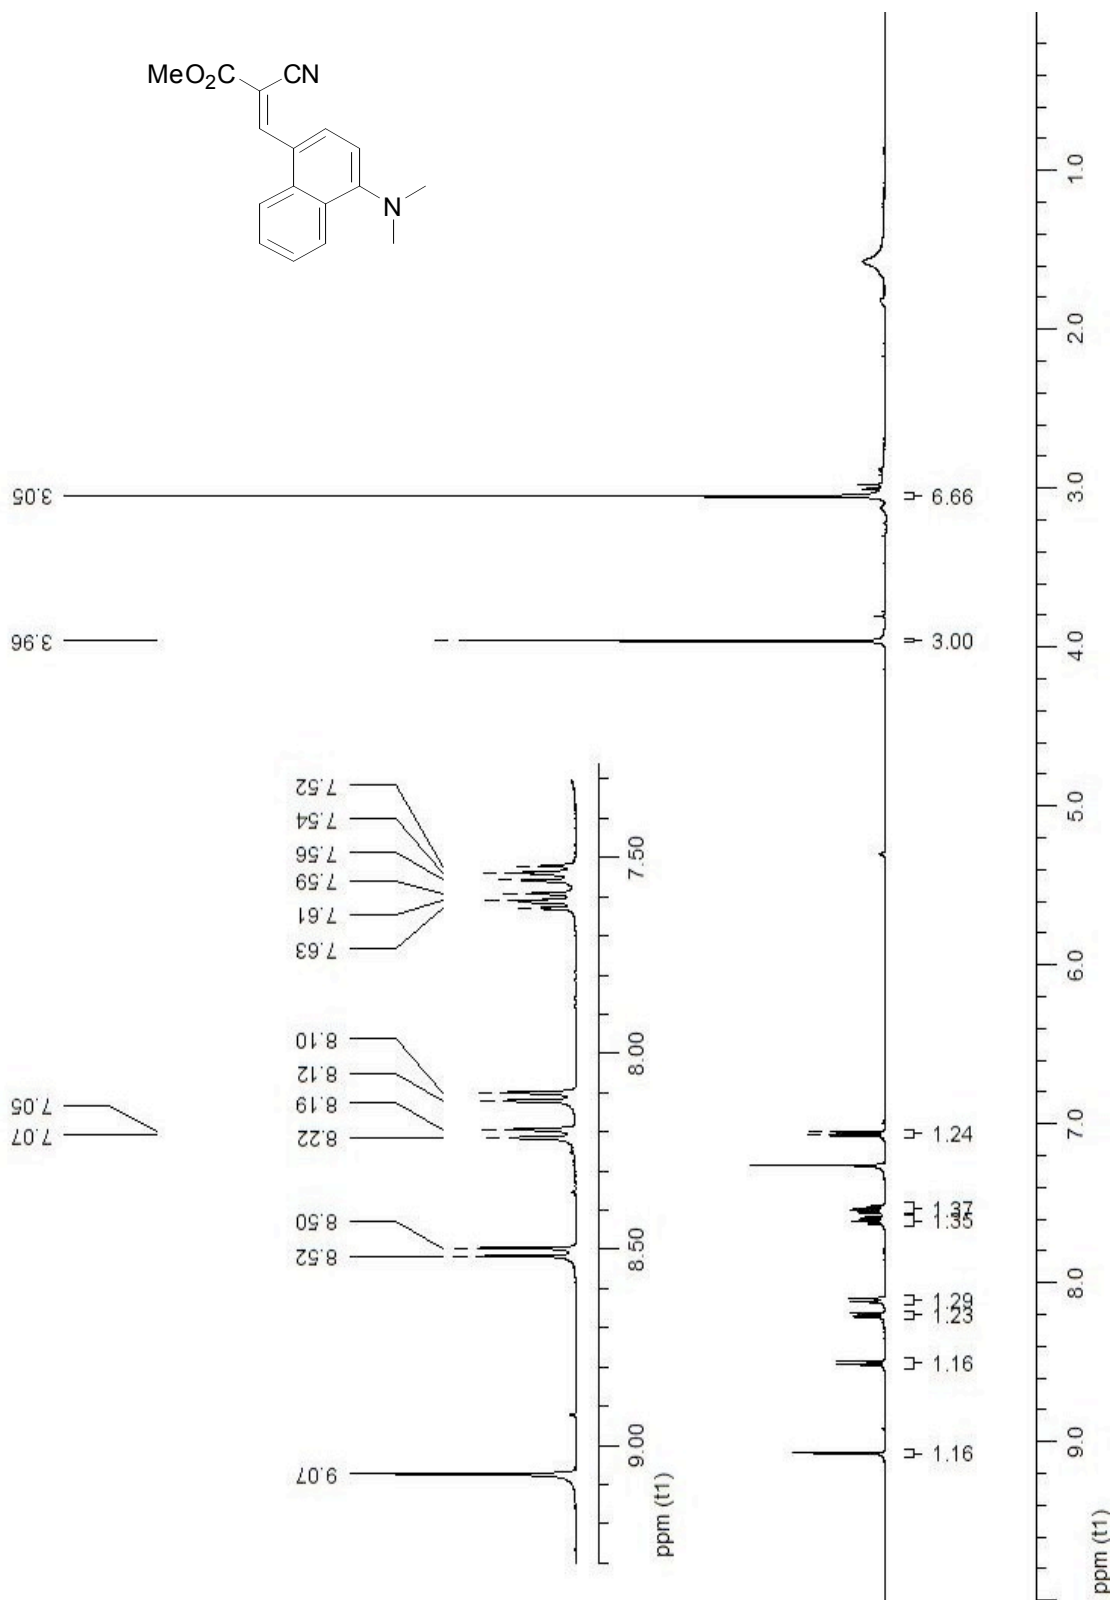

**Spectrum 27.** <sup>1</sup>H NMR (CDCl<sub>3</sub>, 400MHz) of compound 7

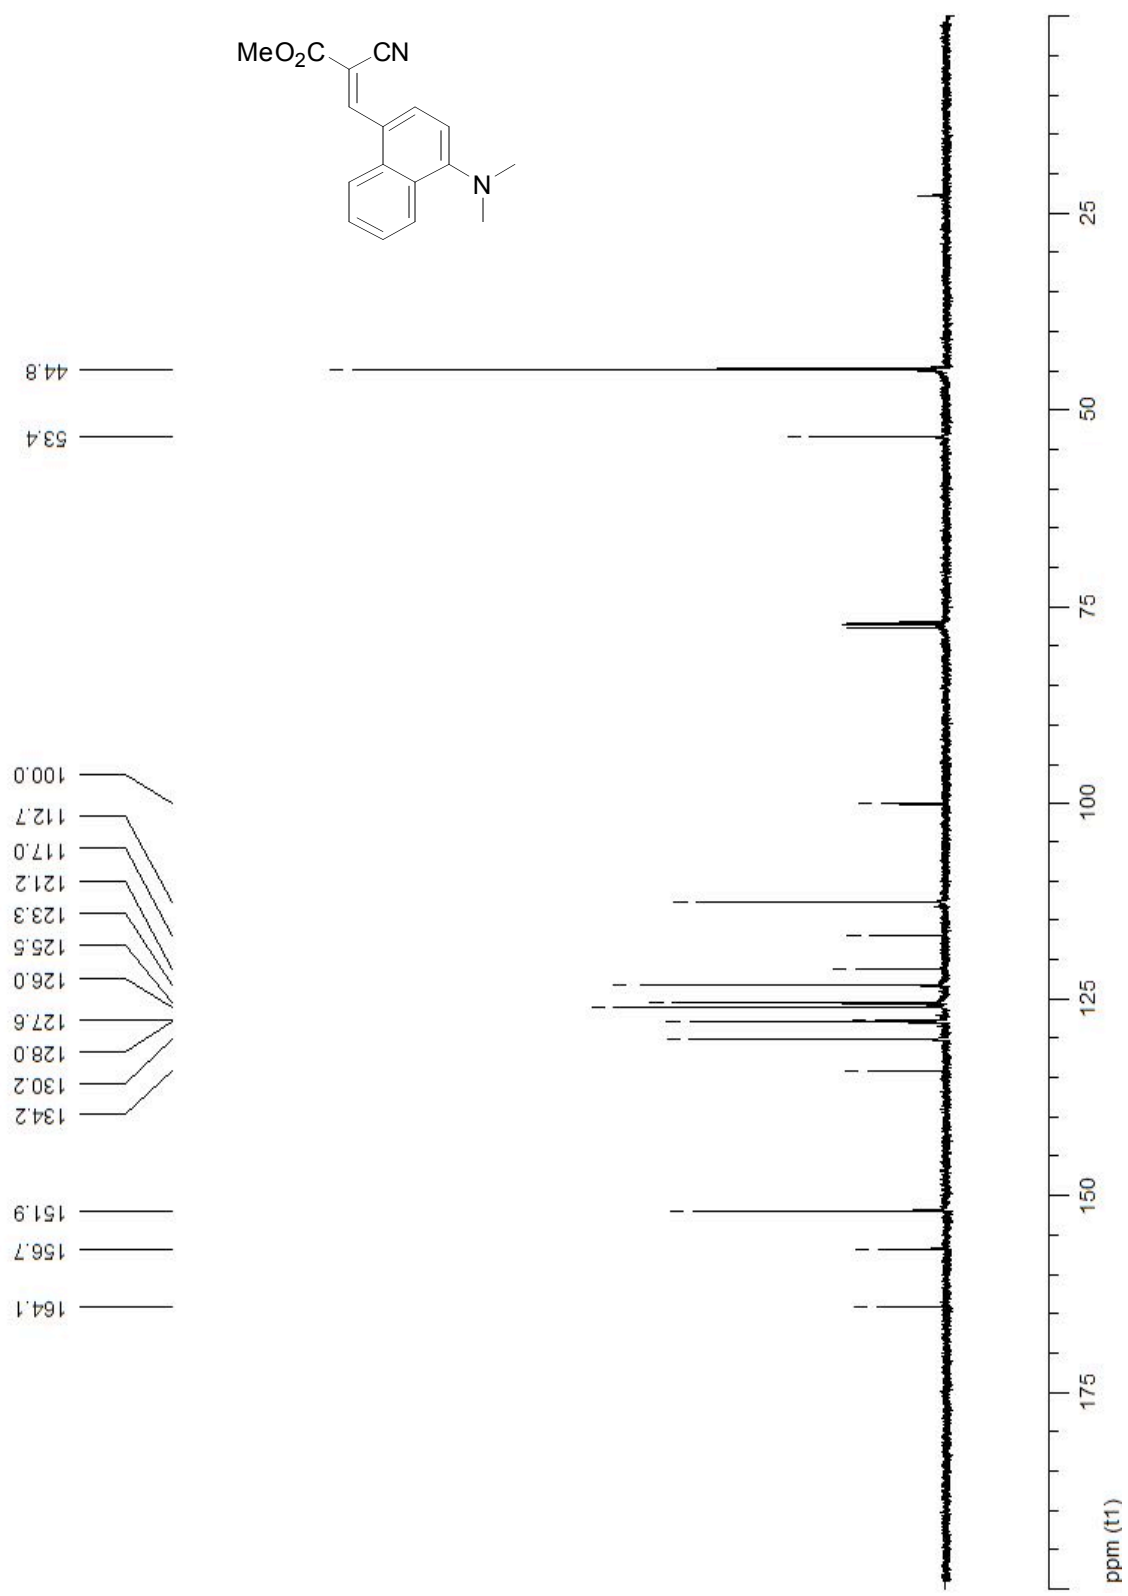

**Spectrum 28.**  $^{13}\text{C}$ NMR ( $\text{CDCl}_3$ , 100MHz) of compound 7

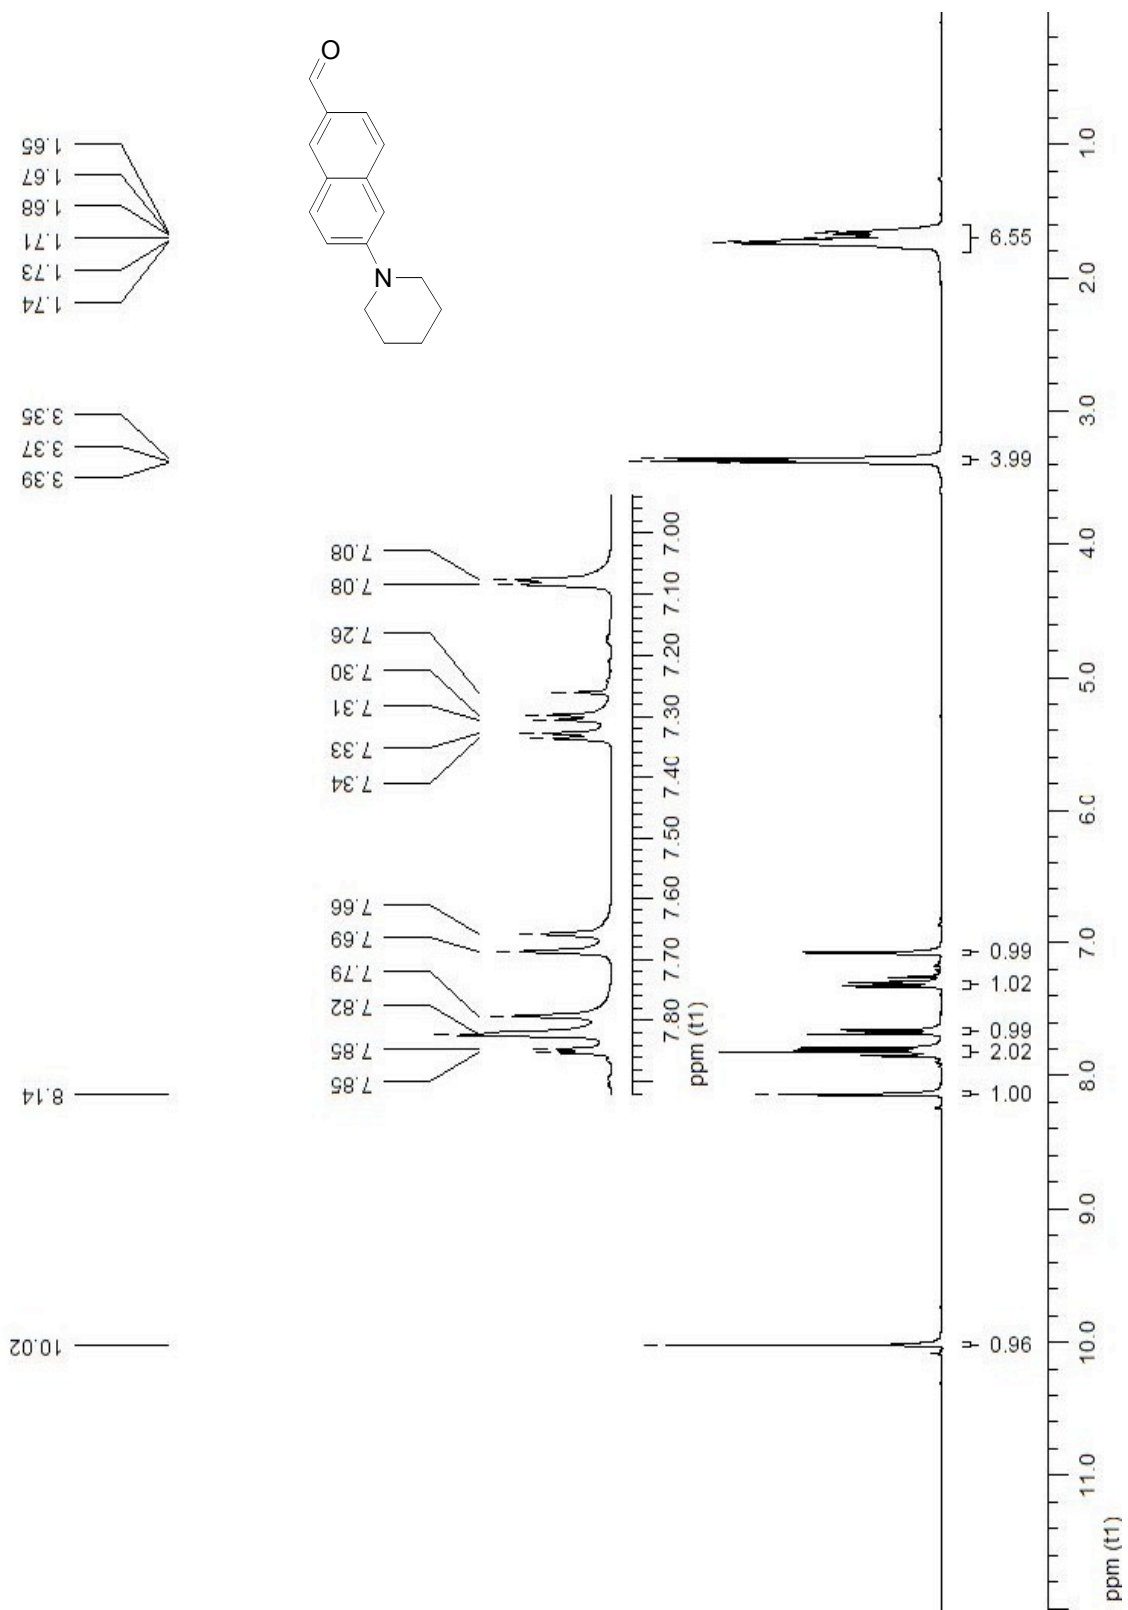

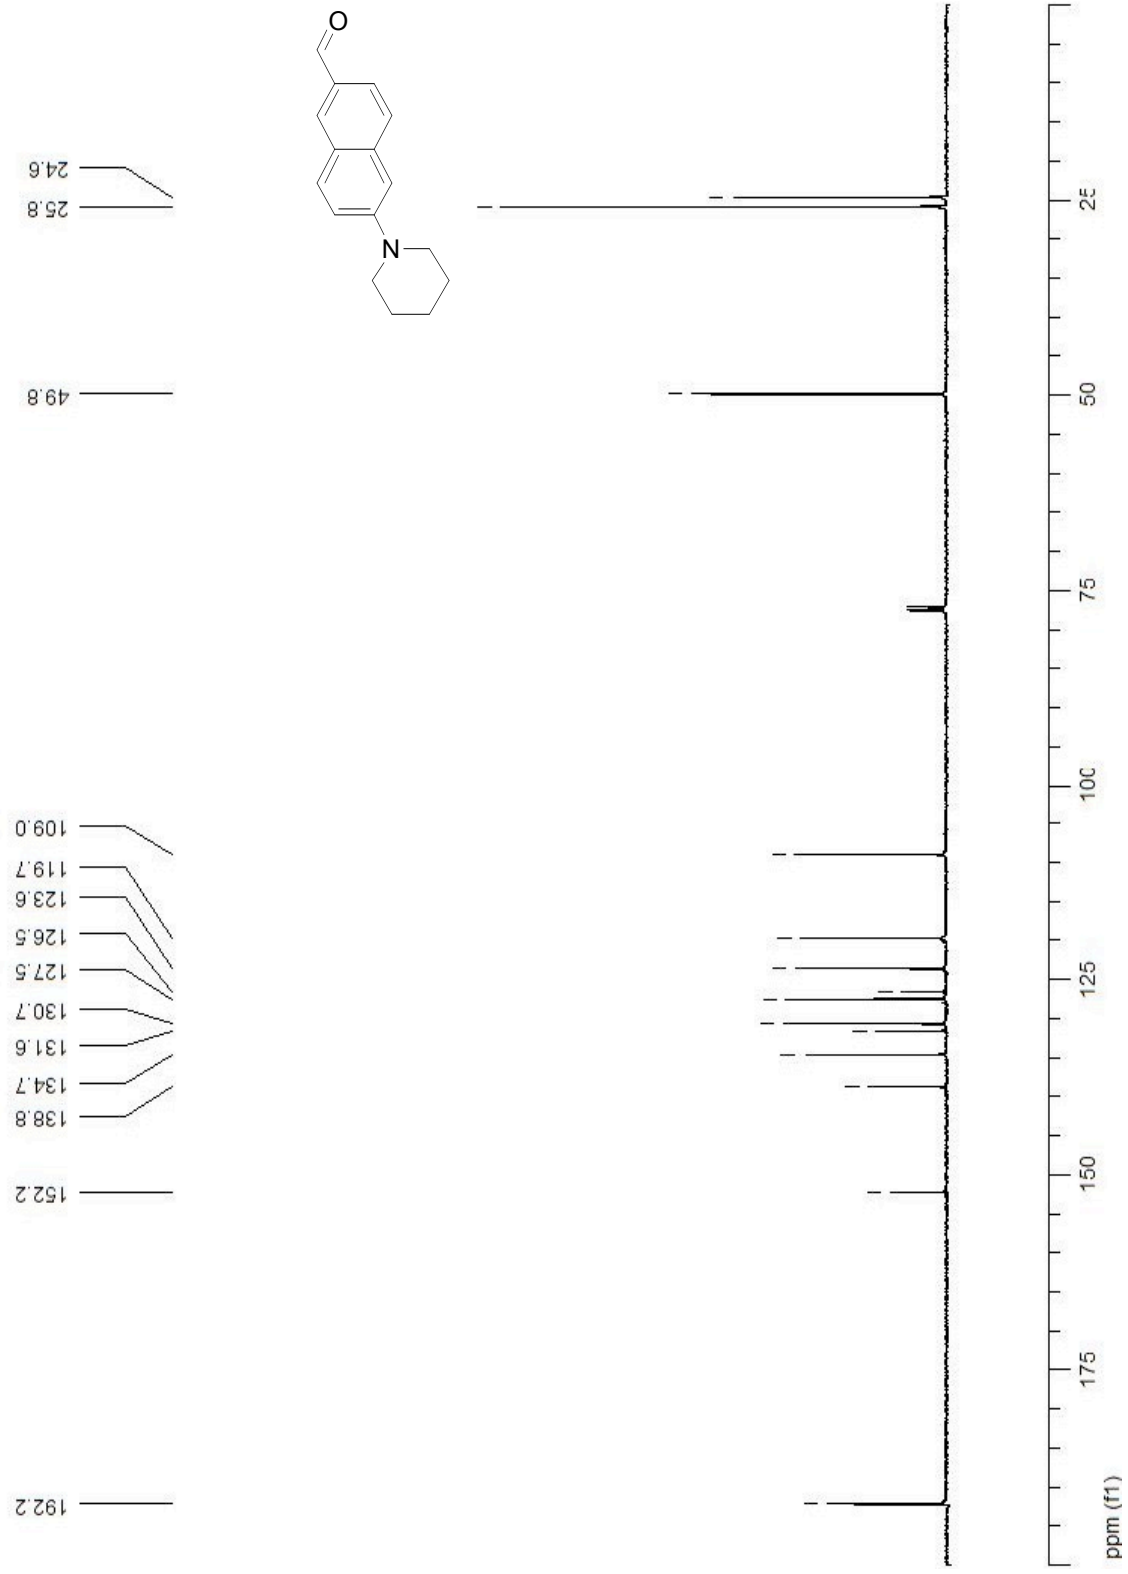





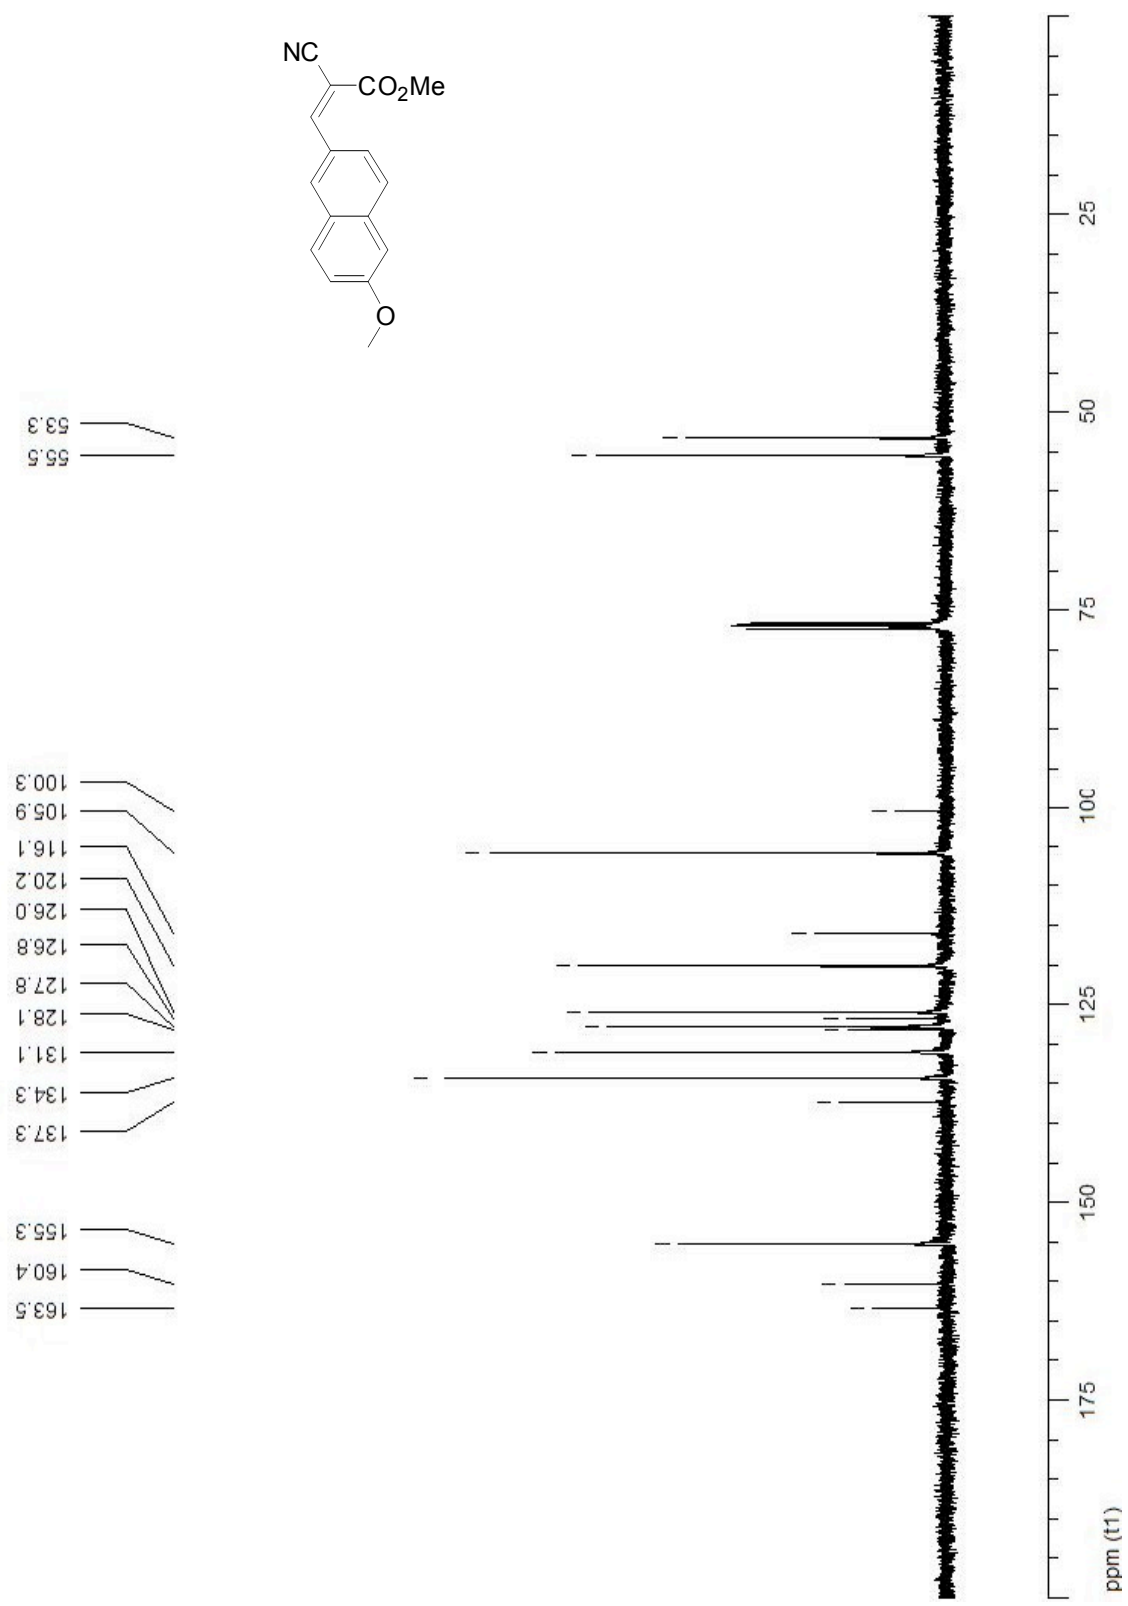

**Spectrum 32.** <sup>13</sup>CNMR (CDCl<sub>3</sub>, 100MHz) of compound **10**

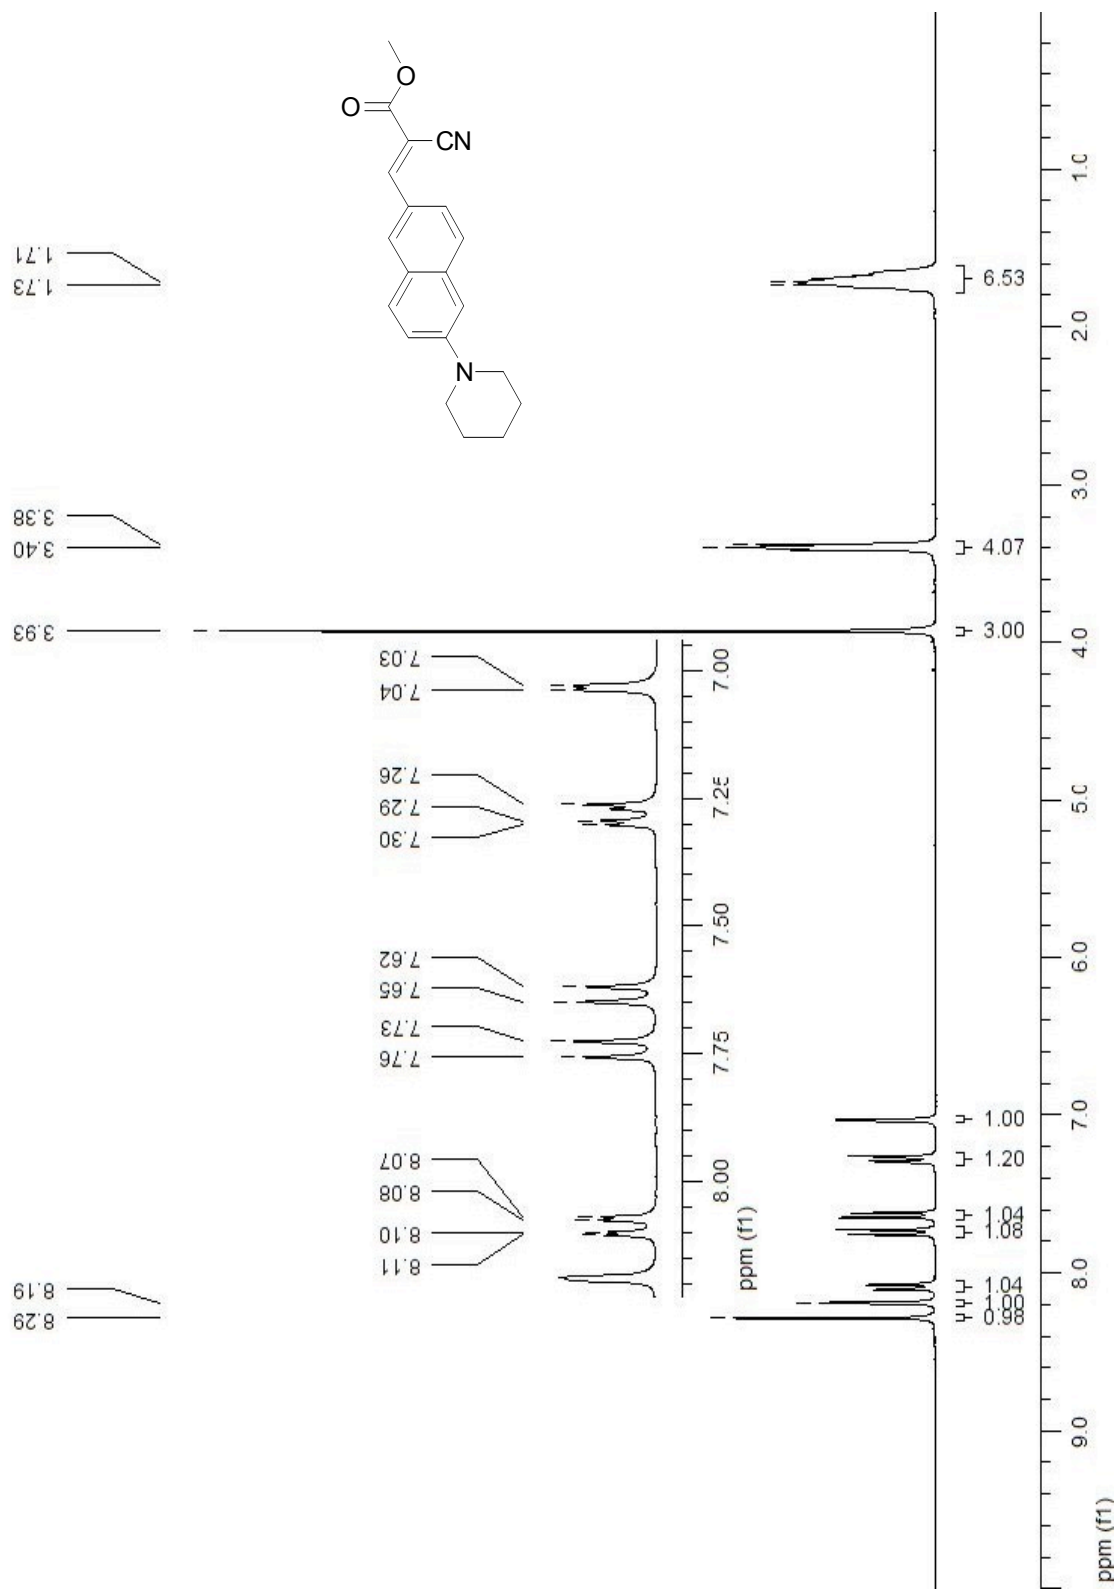

**Spectrum 33.** <sup>1</sup>H NMR (CDCl<sub>3</sub>, 300MHz) of compound **11**

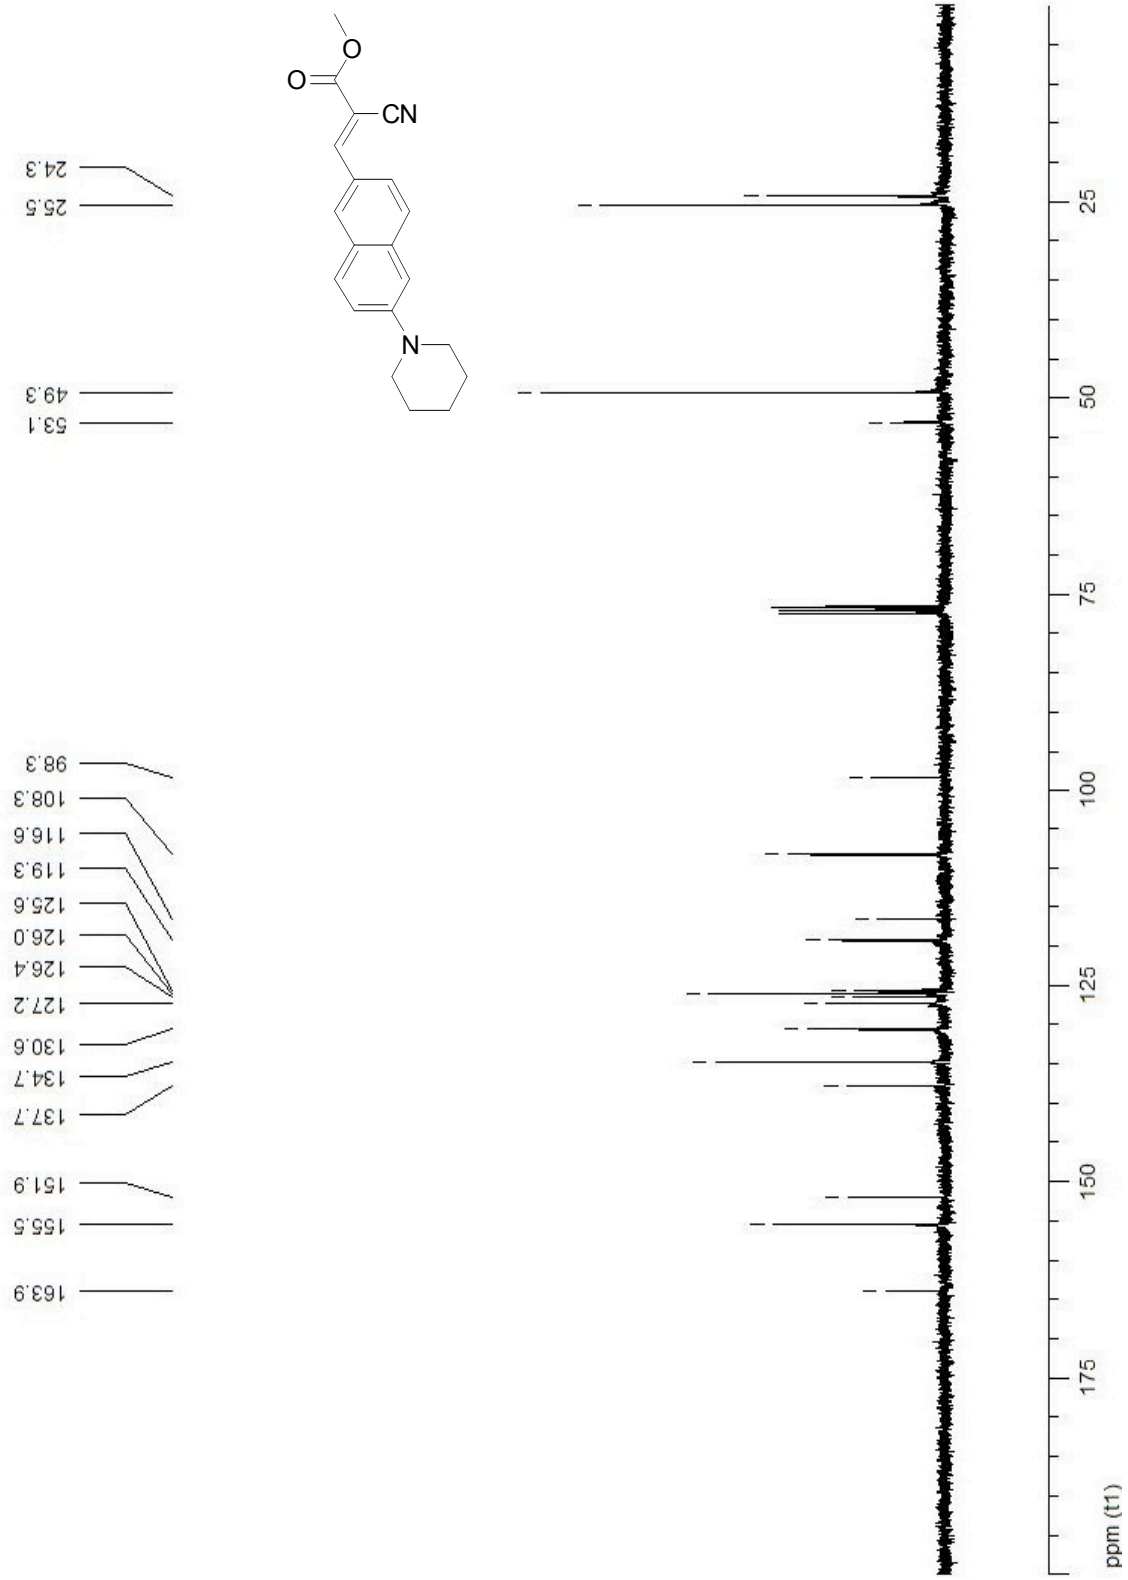

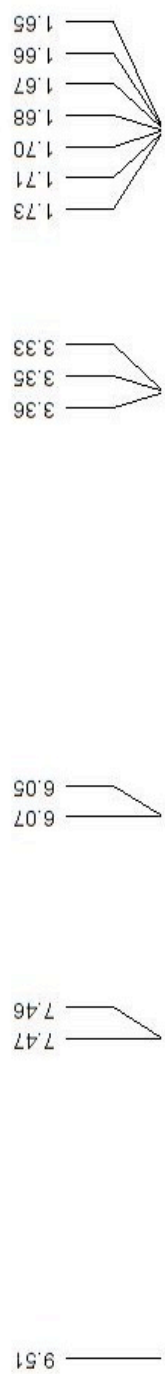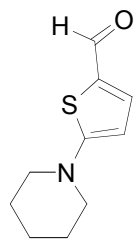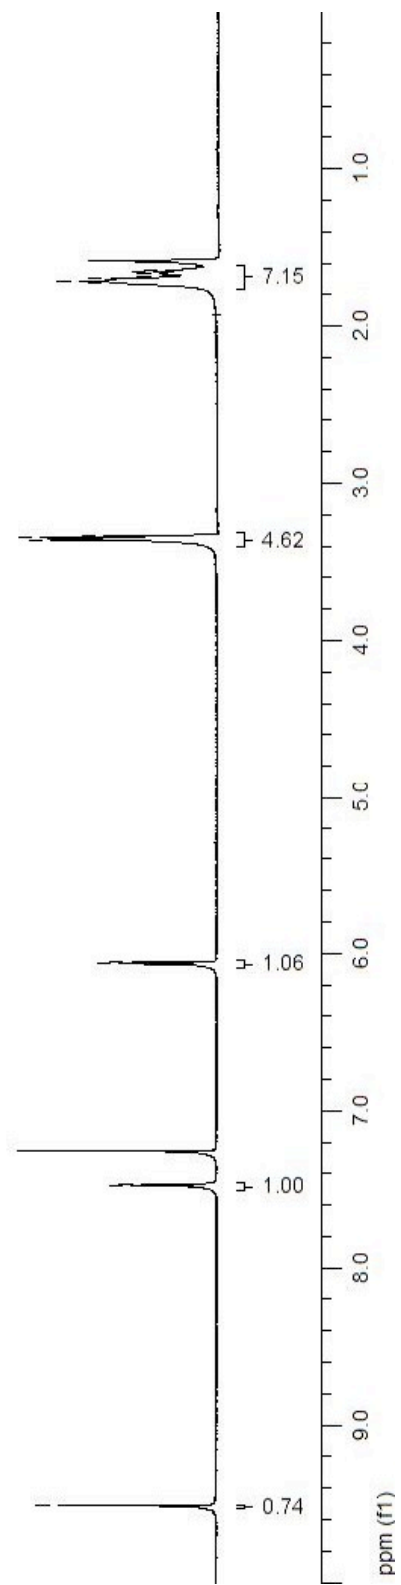

**Spectrum 35.** <sup>1</sup>H NMR (CDCl<sub>3</sub>, 400MHz) of compound **13**

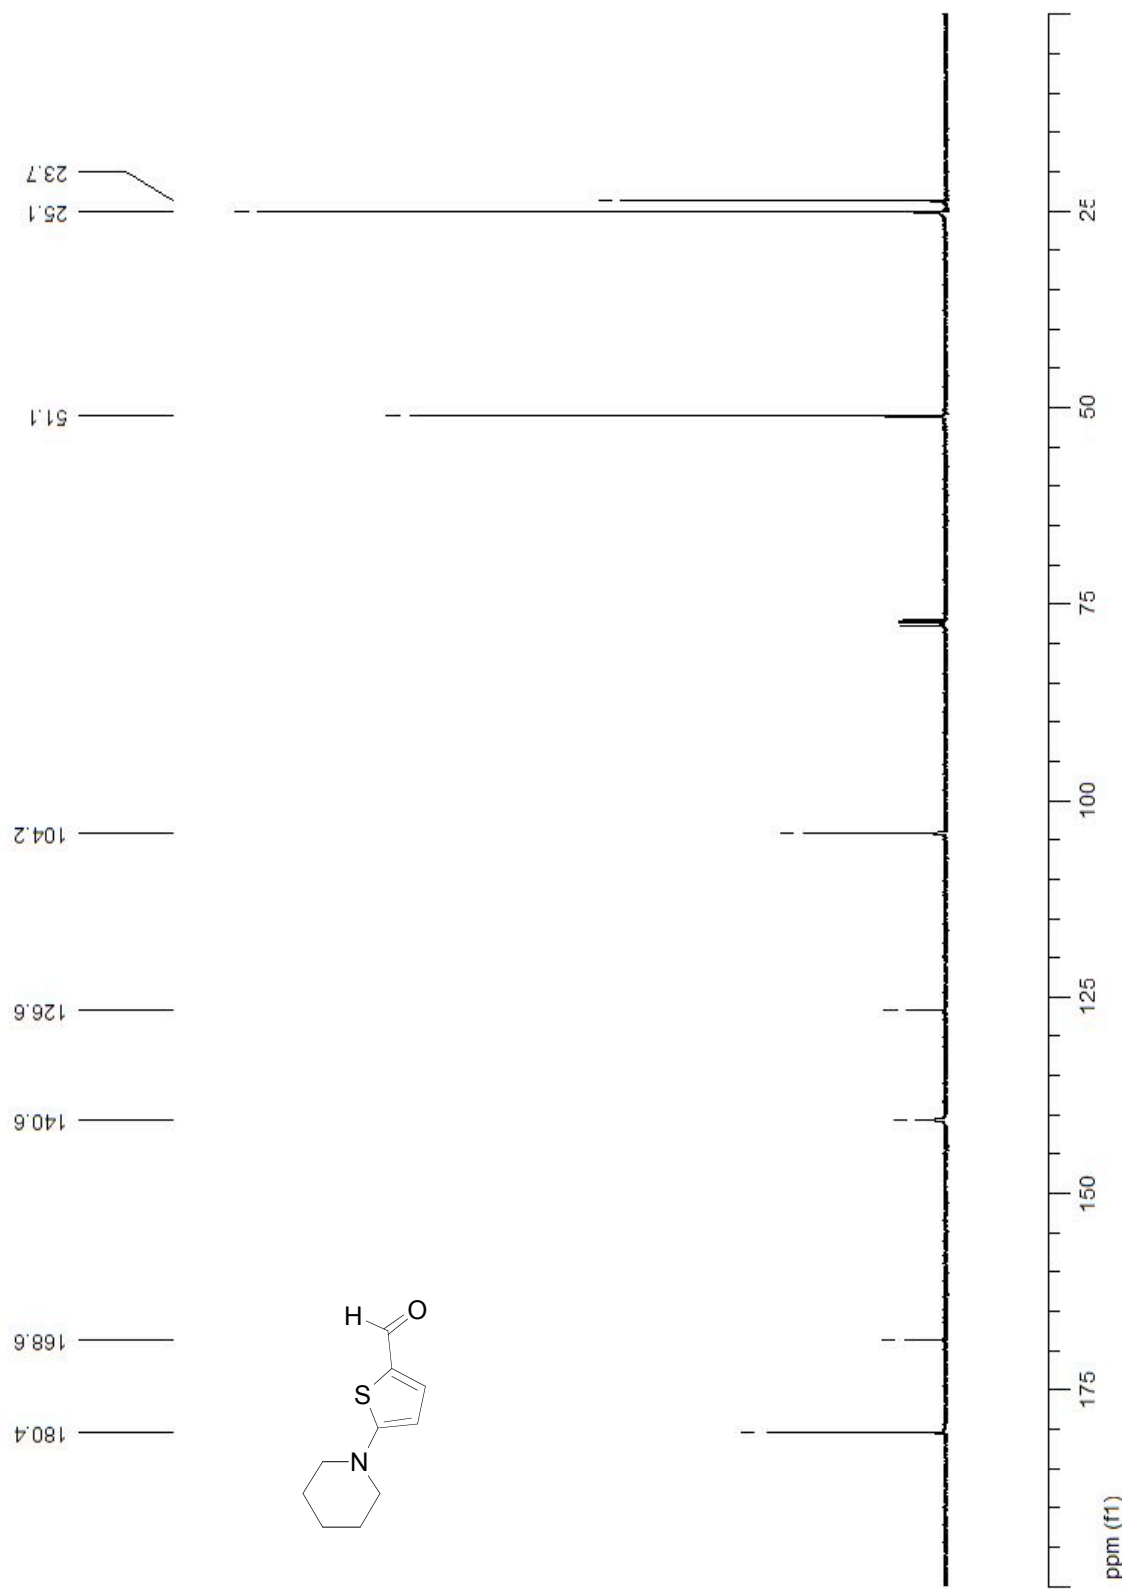

**Spectrum 36.** <sup>13</sup>CNMR (CDCl<sub>3</sub>, 100MHz) of compound **13**

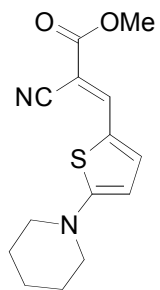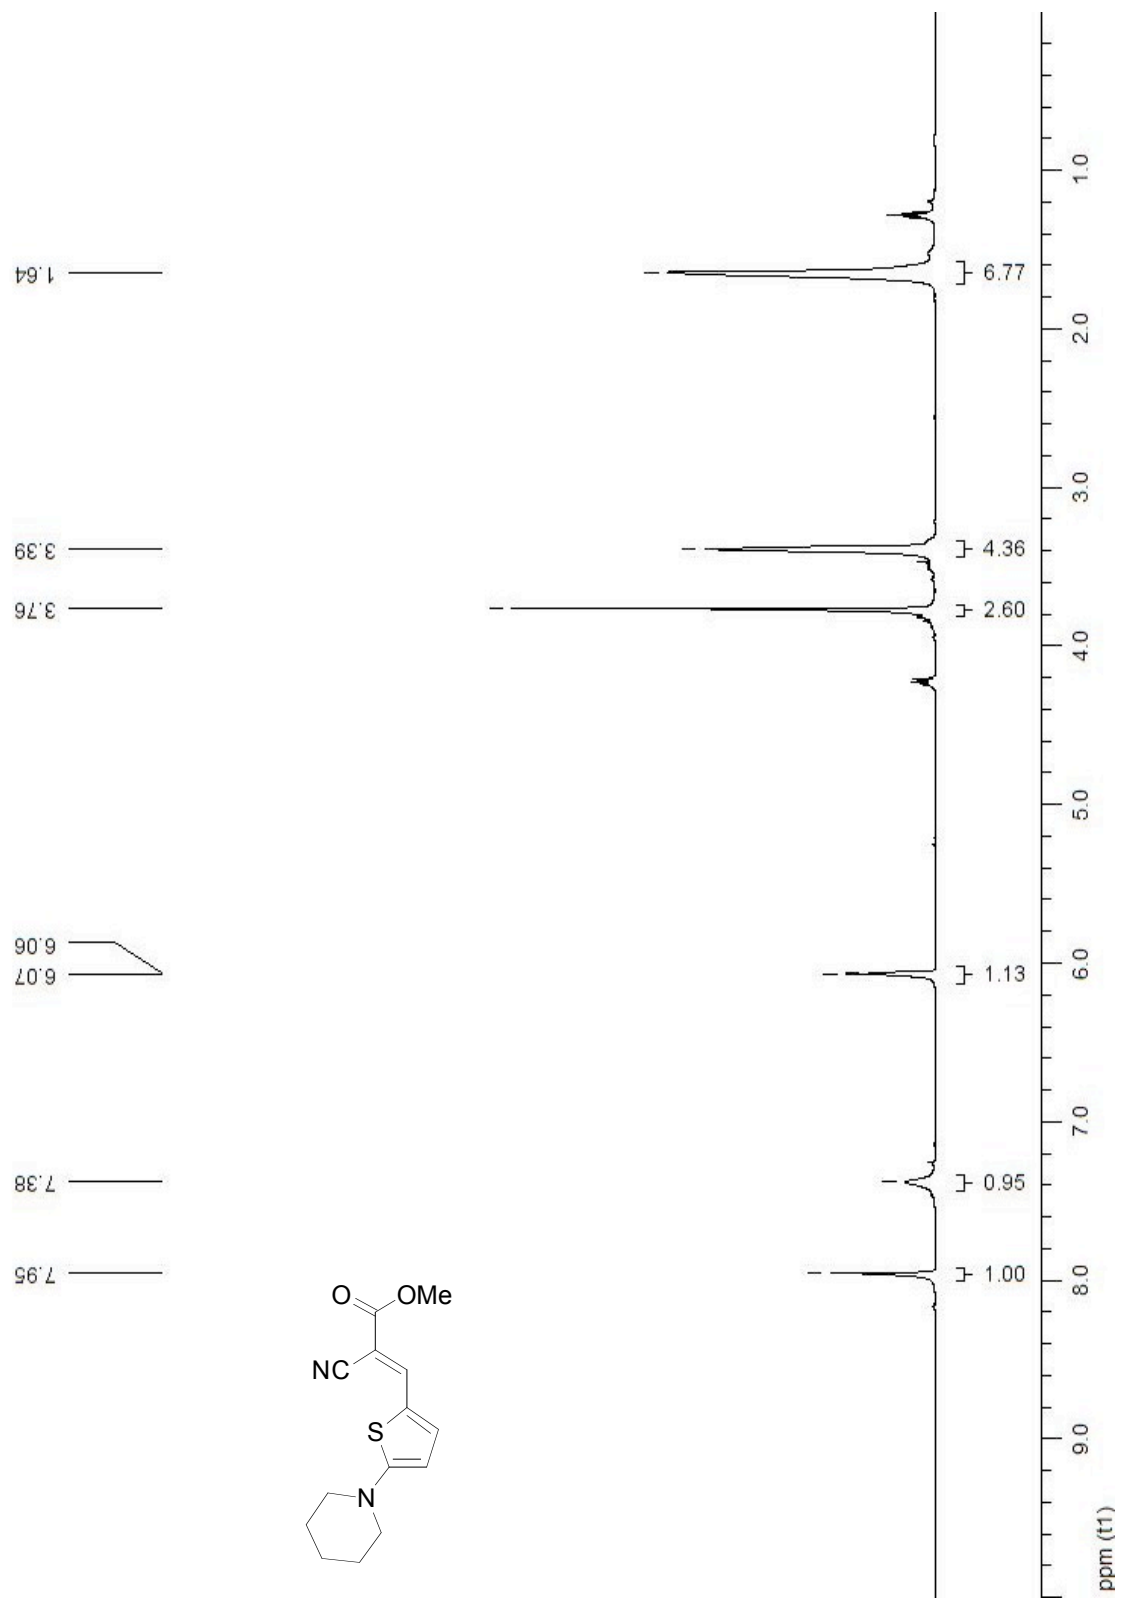

**Spectrum 37.**  $^1\text{H}$ NMR ( $\text{CDCl}_3$ , 400MHz) of compound **14**

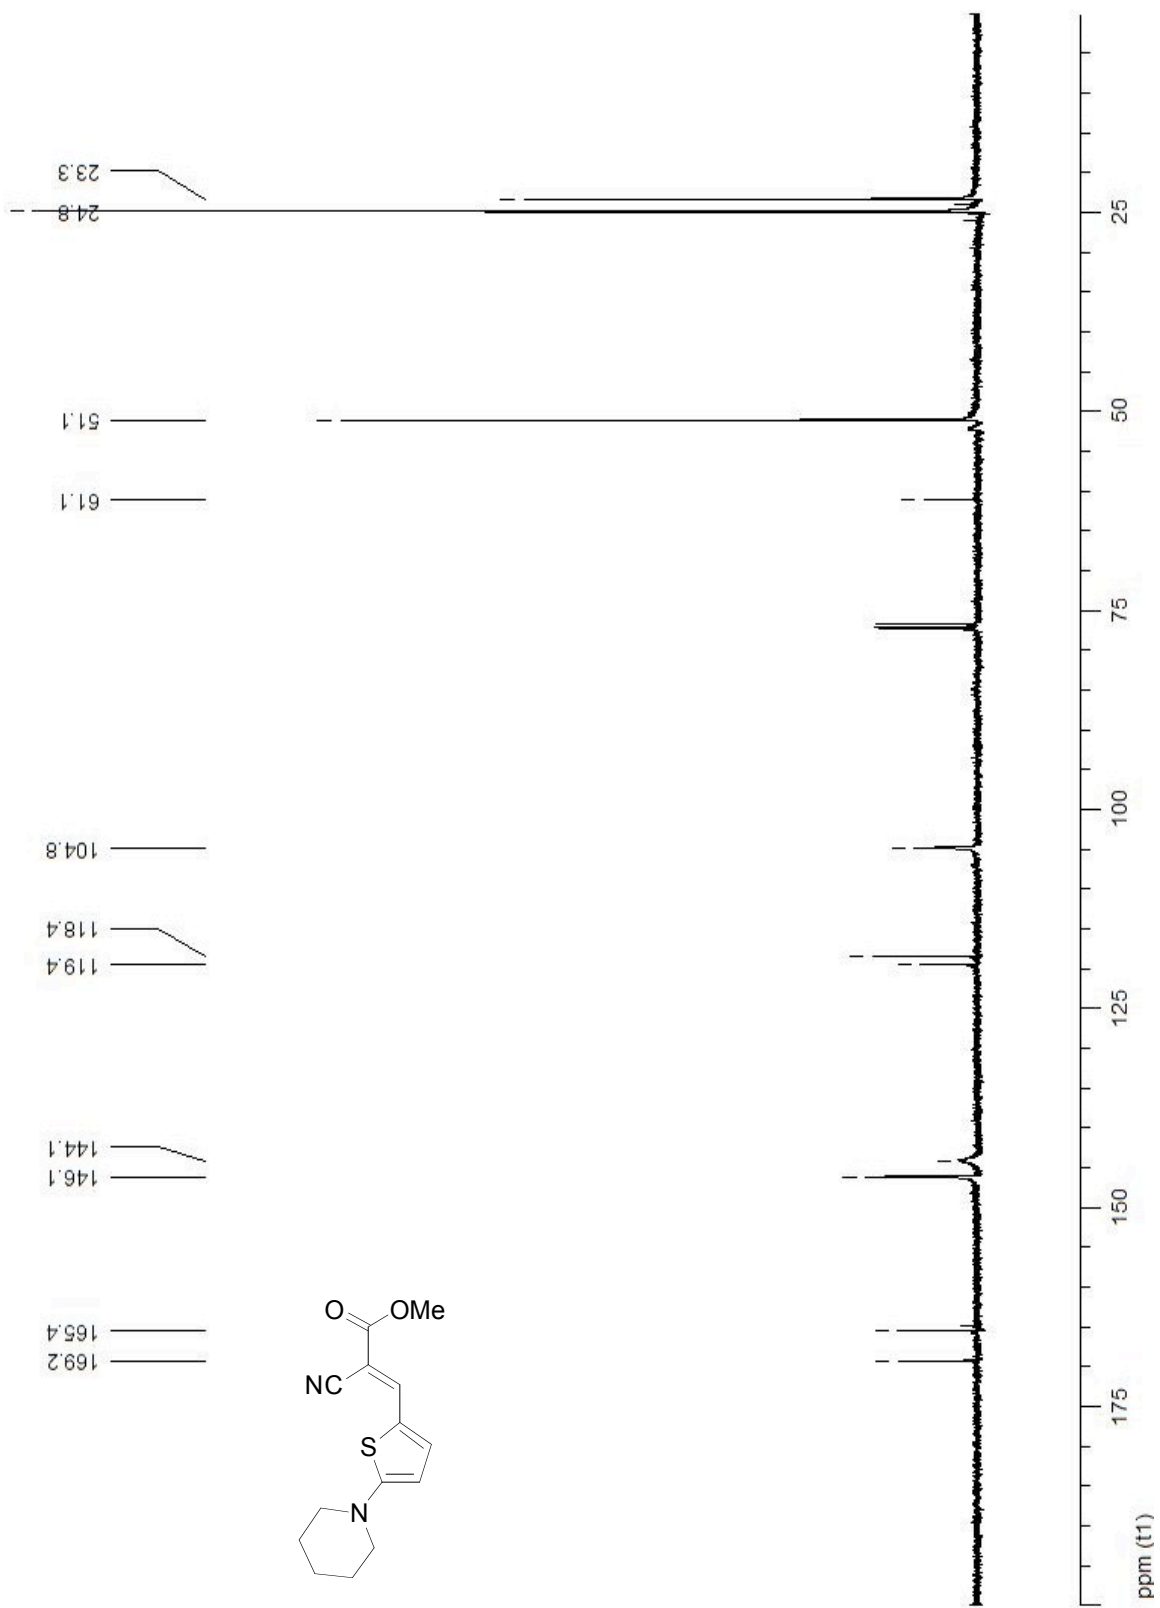

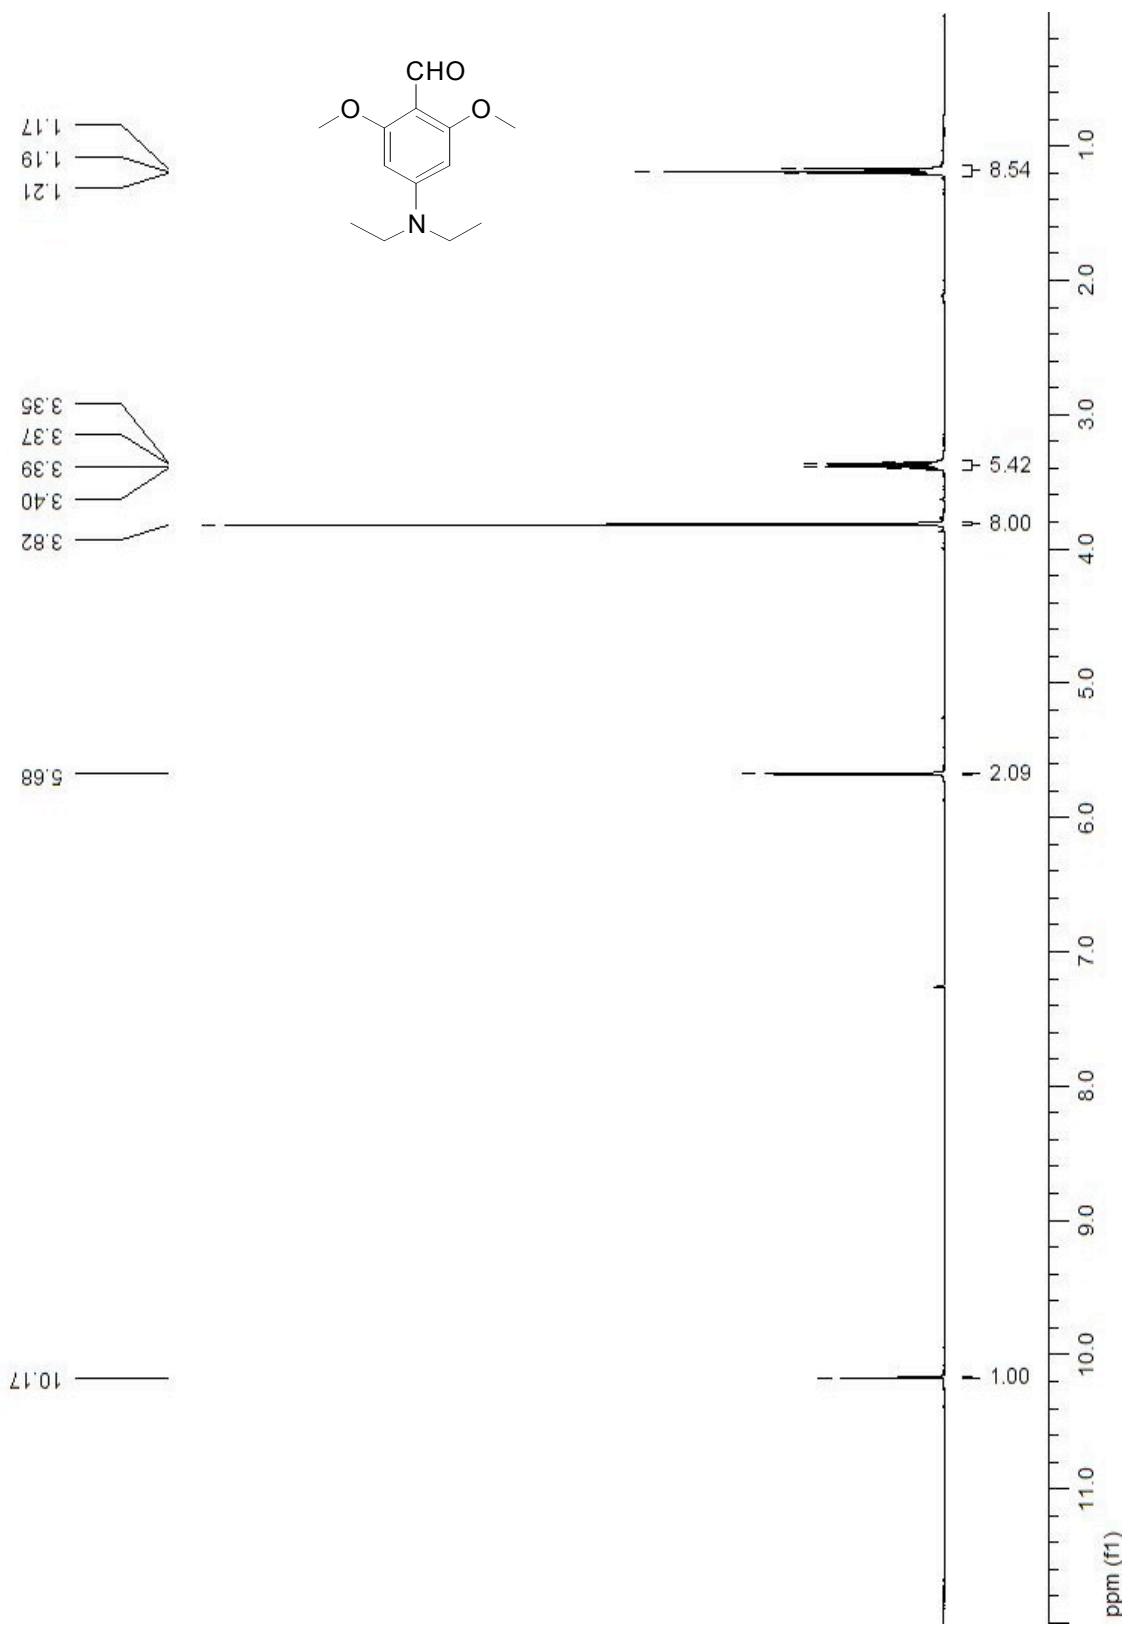

**Spectrum 39.** <sup>1</sup>H NMR (CDCl<sub>3</sub>, 400MHz) of compound 17



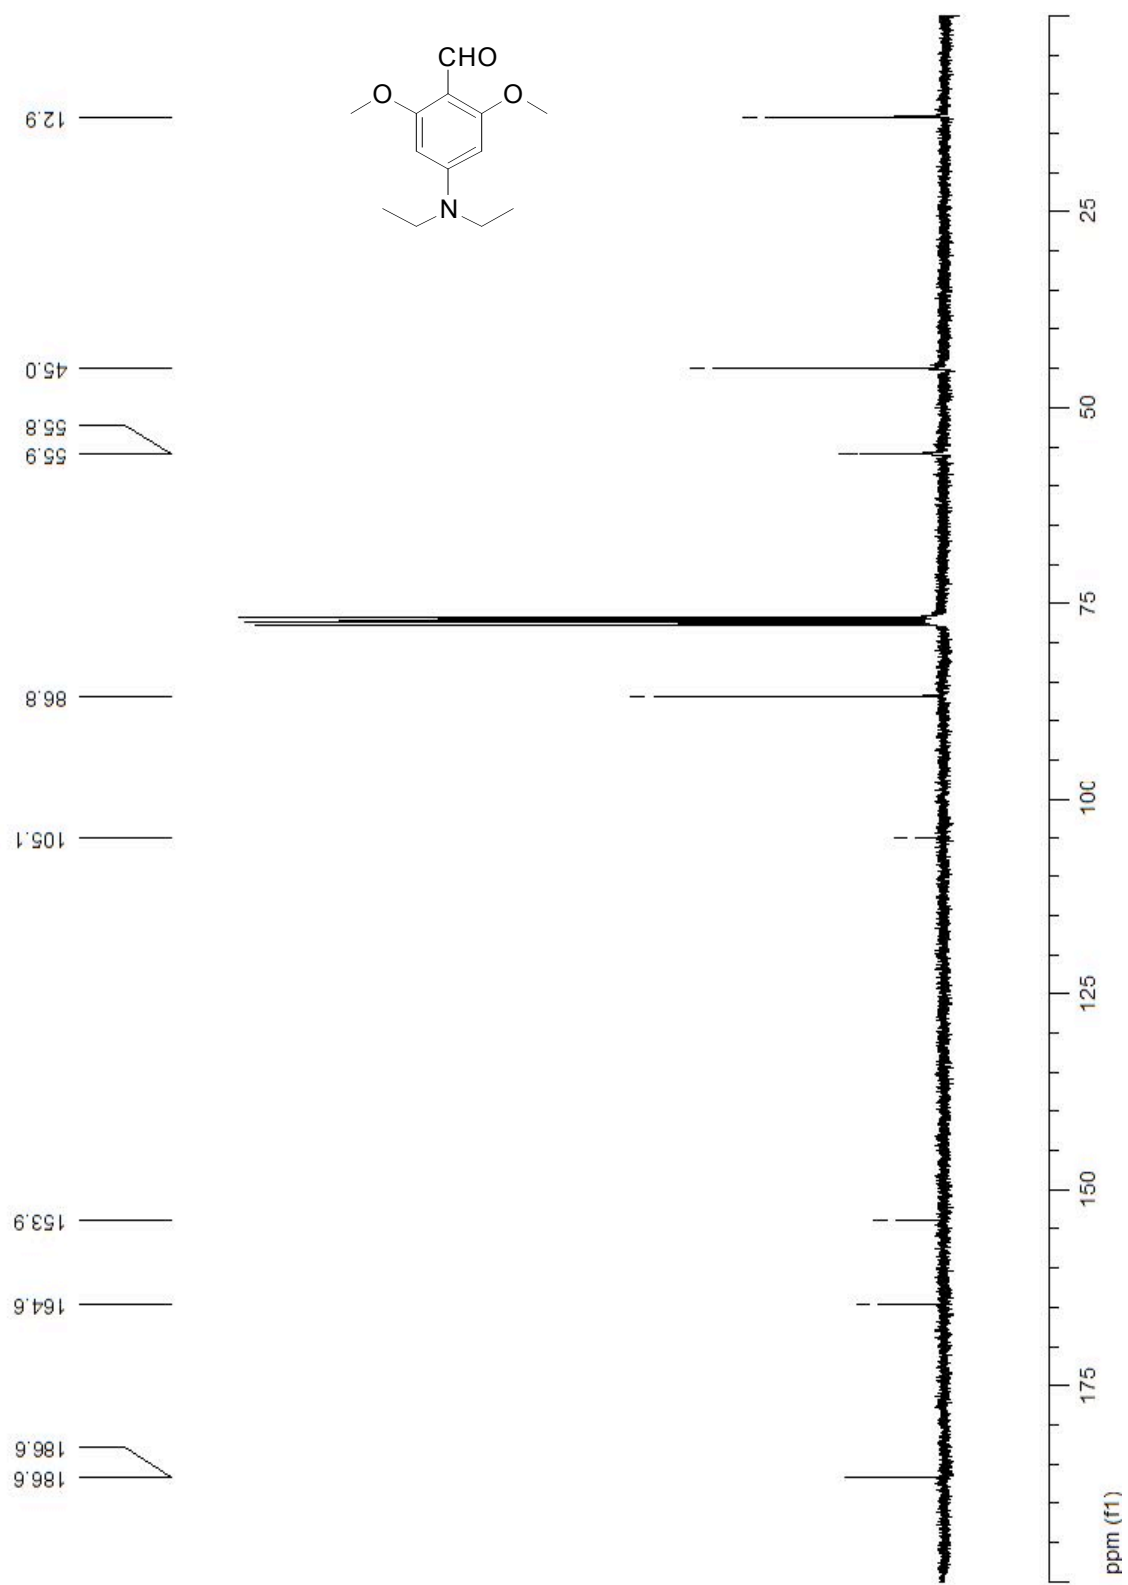

**Spectrum 40.**  $^{13}\text{C}$ NMR ( $\text{CDCl}_3$ , 75 MHz) of compound **17**

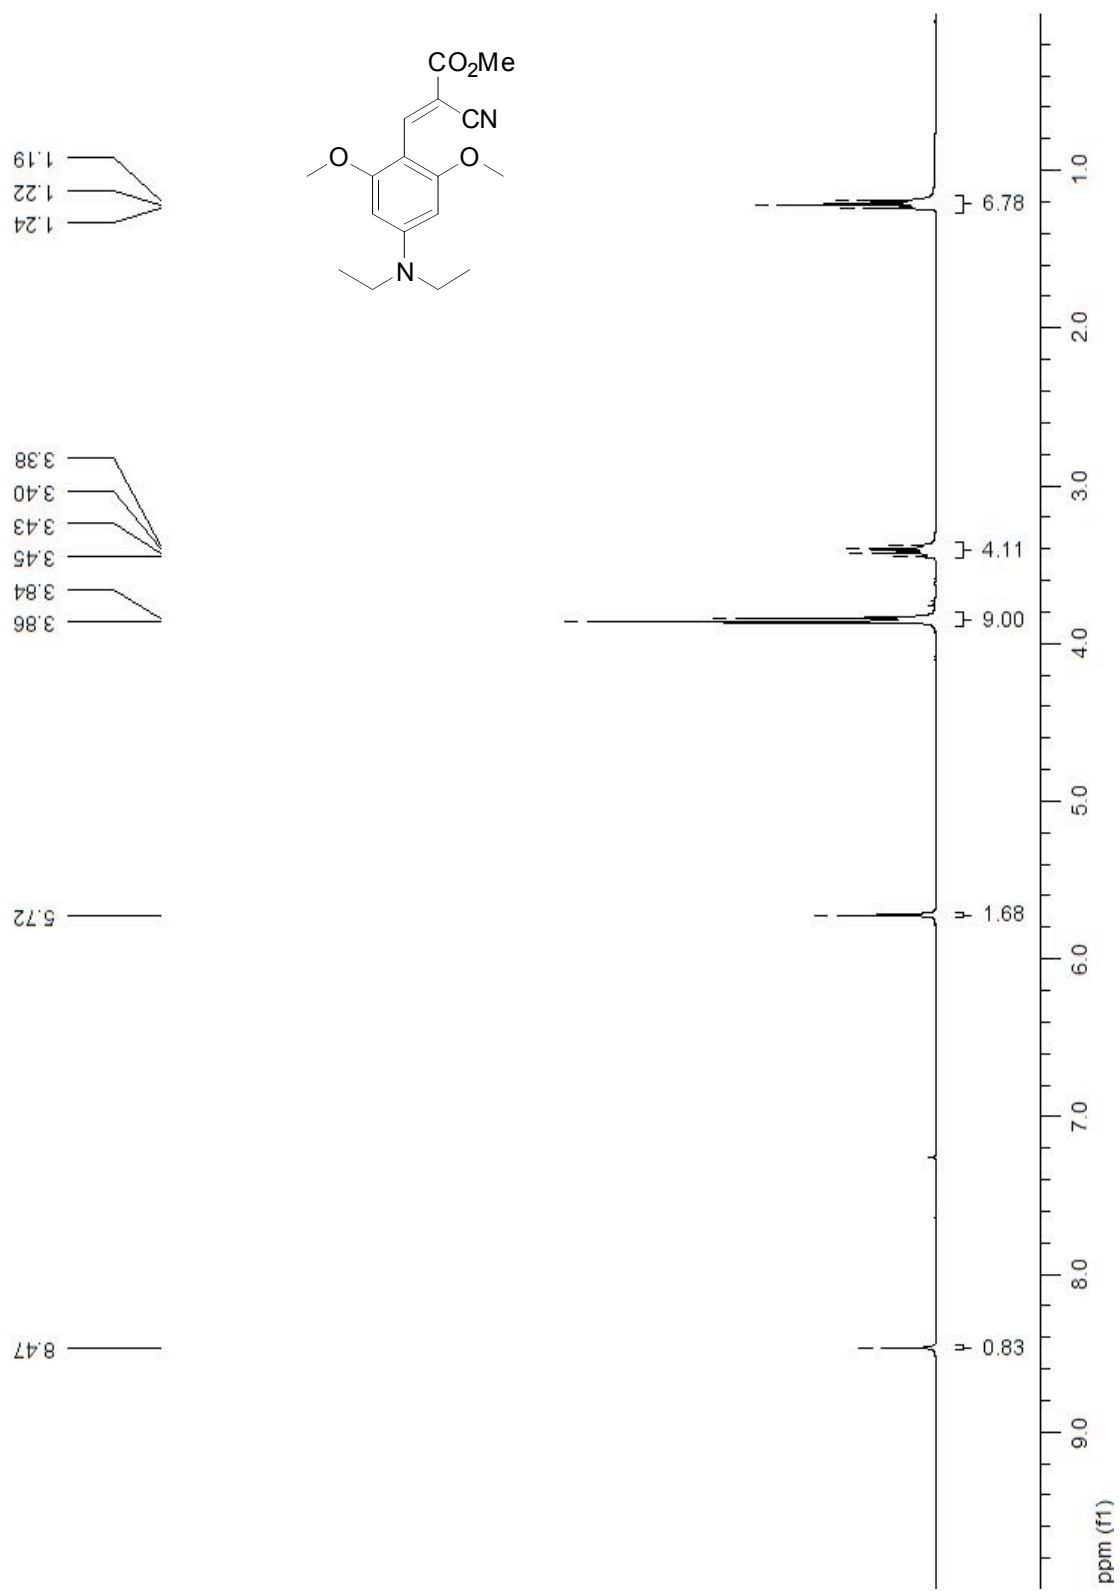

**Spectrum 41.** <sup>1</sup>H NMR (CDCl<sub>3</sub>, 300MHz) of compound **18**

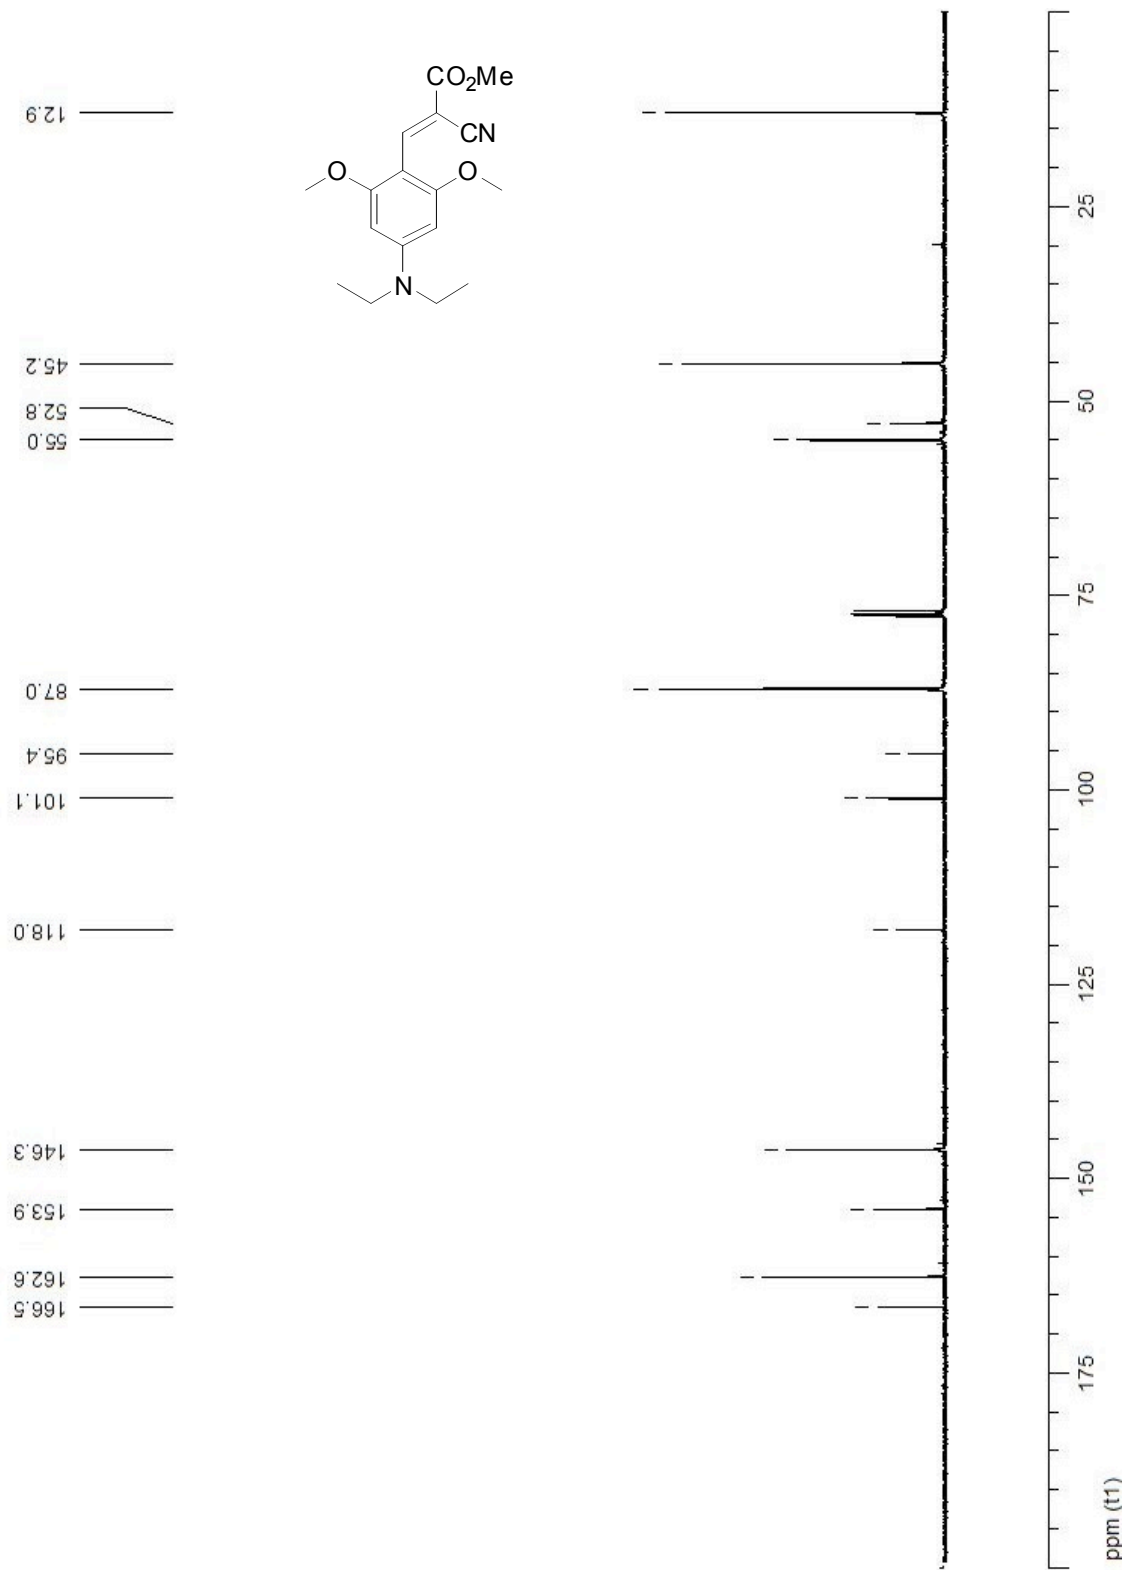

Supplement: NIHMS175020-supplement-01.pdf [file NIHMS175020-supplement-01.pdf]
